# Supplementary material for: Time in therapeutic range and stability over time for warfarin users in clinical practice: a retrospective cohort study using linked routinely collected health data in Alberta, Canada
Source: PubMed Central journal article supplement — BMJ Open. 2018 Jan 29;8(1):e016980. doi: 10.1136/bmjopen-2017-016980 (PMC5829778; doi:10.1136/bmjopen-2017-016980), 2018-01-29
Supplement: bmjopen-2017-016980.draft_revisions.pdf [file bmjopen-2017-016980.draft_revisions.pdf]

# BMJ Open

## TIME IN THERAPEUTIC RANGE AND STABILITY OVER TIME FOR WARFARIN USERS IN CLINICAL PRACTICE: AN OBSERVATIONAL STUDY USING LINKED ROUTINELY COLLECTED HEALTH DATA

|                                 |                                                                                                                                                                     |
|---------------------------------|---------------------------------------------------------------------------------------------------------------------------------------------------------------------|
| Journal:                        | <i>BMJ Open</i>                                                                                                                                                     |
| Manuscript ID                   | bmjopen-2017-016980                                                                                                                                                 |
| Article Type:                   | Research                                                                                                                                                            |
| Date Submitted by the Author:   | 23-Mar-2017                                                                                                                                                         |
| Complete List of Authors:       | Mcalister, Finlay; University of Alberta, Medicine; University of Alberta Wiebe, Natasha; University of Alberta, Medicine Hemmelgarn, Brenda; University of Calgary |
| <b>Primary Subject Heading</b>: | Cardiovascular medicine                                                                                                                                             |
| Secondary Subject Heading:      | Evidence based practice, General practice / Family practice                                                                                                         |
| Keywords:                       | atrial fibrillation, warfarin, Quality in health care < HEALTH SERVICES ADMINISTRATION & MANAGEMENT                                                                 |
|                                 |                                                                                                                                                                     |

SCHOLARONE™  
Manuscripts

1  
2  
3  
4  
5  
6  
7  
8  
9  
10  
11  
12  
13  
14  
15  
16  
17  
18  
19  
20  
21  
22  
23

**TIME IN THERAPEUTIC RANGE AND STABILITY OVER TIME FOR WARFARIN  
USERS IN CLINICAL PRACTICE: AN OBSERVATIONAL STUDY USING LINKED  
ROUTINELY COLLECTED HEALTH DATA**

24  
25  
26  
27  
28  
29  
30  
31  
32  
33  
34  
35  
36  
37  
38  
39  
40  
41  
42  
43  
44  
45  
46  
47  
48  
49  
50  
51  
52  
53  
54  
55  
56  
57  
58  
59  
60

Finlay A. McAlister,<sup>1</sup> MD MSc

Natasha Wiebe,<sup>1</sup> MMath PStat

Brenda R. Hemmelgarn,<sup>2,3</sup> MD PhD

**Correspondence:**

Dr. F. McAlister, 5-134C Clinical Sciences Building,  
University of Alberta, 11350 83 Avenue, Edmonton, Alberta, Canada T6G 2G3  
Tel: (780) 492-9824 Fax: (780) 492-7277 e-mail: Finlay.McAlister@ualberta.ca

1. Faculty of Medicine and Dentistry, University of Alberta, Edmonton, Canada
2. Cumming School of Medicine, Division of Nephrology, University of Calgary, Alberta, Canada
3. Department of Community Health Sciences, University of Calgary, Calgary, Alberta, Canada

**Running Title: Stability of TTR over time**

**Keywords:** atrial fibrillation; warfarin; quality of care

**Word Count: 4877 Total, 300 Abstract, 2560 Text, 3 Tables, 2 Figures, 22  
References**

## ABSTRACT

**Objectives:** As there is debate whether warfarin-treated patients with non-valvular atrial fibrillation (NVAF) who exhibit good control will experience deterioration in control over time, we designed this study to examine the time in therapeutic range (TTR) in a population-based cohort of patients with NVAF recently initiated on warfarin.

**Design:** Retrospective cohort study using routinely collected health data from 2008 to 2015.

**Setting:** The entire Canadian province of Alberta.

**Participants:** All adult Albertans with NVAF who were taking warfarin for more than one month.

**Main Outcome Measures:** We examined frequency of INR monitoring and TTR using the Rosendaal method with time zero set at 31 days after the first warfarin dispensation.

**Results:** Of 81,775 patients with NVAF dispensed warfarin, 34,818 (42.6%) had less than 3 INRs measured in months 1-6. Of the 46,957 that went for regular INR monitoring in months 1-6 (median number of INRs 10, IQR 6-15), 38,888 (82.8%) met the definition of good control (TTR  $\geq$ 65%); good control continued to be exhibited by 28,501 (88.9% of those who remained on warfarin) during months 7-12 and 24,447 (89.8% of continuing warfarin users) in months 13-18. Good control in the first 6 months predicted good control over the subsequent year: c index 0.785 [95% CI 0.778-0.792] for months 7-12 and c index 0.756 [95% CI 0.749-0.763] for months 13-18.

1  
2  
3 **Conclusions:** Two fifths of warfarin-treated patients had insufficient INR  
4  
5 monitoring - this should be considered in the initial choice of anticoagulant and identifies  
6  
7 a target for future quality improvement efforts. However, of those warfarin-treated  
8  
9 patients who went for regular INR monitoring, nearly 90% exhibited levels of control  
10  
11 similar to that in randomized trials and this remained constant over time. Thus, in  
12  
13 patients who have already exhibited adherence with regular monitoring and good TTR,  
14  
15 warfarin can still be a reliable anticoagulation option.  
16  
17  
18  
19  
20  
21  
22  
23  
24  
25  
26  
27  
28  
29  
30  
31  
32  
33  
34  
35  
36  
37  
38  
39  
40  
41  
42  
43  
44  
45  
46  
47  
48  
49  
50  
51  
52  
53  
54  
55  
56  
57  
58  
59  
60

## ARTICLE SUMMARY

### Strengths of this Study:

-Addresses the question of whether NVAF patients who are well controlled on warfarin could continue to be reliably anticoagulated with warfarin

-Population based study of all adults with NVAF in an entire Canadian province, with complete capture of all interactions with the health care system, prescribing data, and INR results

### Limitations of this Study:

-we assumed the target INR ranges were 2-3 for all patients, but recognize that for a small proportion of NVAF patients a higher (or lower) range may be targeted clinically

-we focused solely on INR control and didn't examine clinical endpoints

1  
2  
3  
4  
5  
6  
7  
8  
9  
10  
11  
12  
13  
14  
15  
16  
17  
18  
19  
20  
21  
22  
23  
24  
25  
26  
27  
28  
29  
30  
31  
32  
33  
34  
35  
36  
37  
38  
39  
40  
41  
42  
43  
44  
45  
46  
47  
48  
49  
50  
51  
52  
53  
54  
55  
56  
57  
58  
59  
60

Although warfarin has been shown to be efficacious in preventing stroke in non-valvular atrial fibrillation (NVAF), it's effectiveness is dependent on being in therapeutic range (INR between 2 and 3).[1-6] However, some practice based studies suggest that only a minority of patients anticoagulated in the community have an average INR between 2 and 3, with wide variability from 29% to 75%.[1,3] The time in therapeutic range (TTR) is a standard measure of warfarin control which incorporates both the frequency of INR measurement and the actual values to interpolate daily INR values and define the percentage of time in range for each patient.[7] A TTR of at least two thirds is often used as the cutpoint for defining "good INR control" since patients randomized to warfarin in the clinical trials proving the efficacy of anticoagulation had their INRs within target range 65% of the time,[2,5] a large cohort with 63% of INRs in the 2-3 range reported warfarin benefits similar to those in the randomized trials,[3] and a post-hoc analysis of the ACTIVE-W Trial demonstrated that warfarin-treated patients with  $\leq 65\%$  of their INRs between 2 and 3 had higher rates of embolic and bleeding events than antiplatelet-treated patients.[4]

One of the key arguments in favour of the direct oral anticoagulants for NVAF is that the TTR for warfarin-treated patients is unpredictable and may well be markedly lower in clinical practice than in the randomized trials proving the efficacy of warfarin. While this is certainly a rationale for choosing a direct oral anticoagulant as the first agent for a patient newly diagnosed with NVAF, as clinicians we are often faced with the issue of what to do with patients who have been well-controlled on warfarin – can such patients be left on warfarin or should we be switching them to direct oral anticoagulants?

1  
2  
3 A recent report from ORBIT-AF raised concern that even when patients initially  
4 exhibit good INR control, this may fluctuate substantially over time: they reported that  
5 only 34% of their patients with outstanding INR control (TTR 80% or more) in the first 6  
6 months of observation continued to exhibit that degree of control over the subsequent  
7 year.[8] However, as care varies widely across regions[1,9,10] and almost 80% of  
8 ORBIT-AF patients were enrolled from specialist offices, we designed this study to  
9 examine the adequacy of anticoagulation in an entire population more closely reflecting  
10 usual clinical practice where most NVAF patients are managed by primary care  
11 physicians. We examined the TTR and stability of INR control over time in a population-  
12 based cohort of adults with NVAF in a universal access health care system similar to  
13 the British National Health Service (the entire Canadian province of Alberta). As a  
14 secondary goal, we evaluated whether TTR and INR stability varied by kidney function.  
15  
16  
17  
18  
19  
20  
21  
22  
23  
24  
25  
26  
27  
28  
29  
30

## 31 **METHODS**

### 32 ***Design:***

33 Retrospective cohort study using routinely collected health data.

### 34 ***Data Sources:***

35 As described in full elsewhere,[11] we used de-identified but linked (using unique  
36 health number identifiers) Alberta Health administrative and laboratory databases  
37 including all residents of Alberta (population 4.3 million people). This project was  
38 approved by Alberta Health and the Health Research Ethics Boards at the University of  
39 Alberta and the University of Calgary with a waiver of individual signed patient consent  
40 (since data was de-identified).  
41  
42  
43  
44  
45  
46  
47  
48  
49  
50  
51  
52  
53

### 54 ***Study Sample:***

1  
2  
3 The cohort consisted of all adult Albertans (aged 18 years or older) with a  
4 diagnosis of AF (ICD-9 CM 427.3 or ICD-10 I48) between January 1, 2008 and March  
5 31, 2015 in any fields of either the discharge abstract database (which captures most  
6 responsible diagnosis and up to 24 secondary diagnoses for all acute care  
7 hospitalizations), the national ambulatory care reporting system (which captures all  
8 visits to emergency rooms or hospital-based specialist clinics in Alberta), or the  
9 physician billing claims databases (see eAppendix for case definitions for NVAF and all  
10 covariates/outcomes listed below). Patients with a history of mitral or aortic valvular  
11 disease, valve surgery (see eAppendix) or end-stage kidney disease (defined as  
12 documented chronic dialysis or prior kidney transplant before onset of NVAF) were  
13 excluded (Figure 1). These NVAF case definitions have been evaluated in multiple  
14 studies, with sensitivity approaching 95% and specificity 99% in those that use both  
15 inpatient and outpatient data (as we did).[12] We restricted this study to patients  
16 dispensed at least one warfarin prescription of 30 days or longer (we linked to the  
17 Pharmacy Information Network and Alberta Blue Cross to obtain all prescription  
18 dispensations for cohort patients of any age). In the secondary analysis by kidney  
19 function, we restricted our analysis to only those with an outpatient serum creatinine  
20 measured at least once in the 6 months after the index date.

21  
22  
23  
24  
25  
26  
27  
28  
29  
30  
31  
32  
33  
34  
35  
36  
37  
38  
39  
40  
41  
42  
43  
44  
45  
46 **Covariates:**

47  
48 As described fully elsewhere,[11,13,14] we identified co-morbidities using the  
49 ICD-9-CM or ICD-10-CA codes validated in administrative databases (with look-back  
50 beginning in April 1994) and we used eGFR (calculated using the CKD-EPI equation) to  
51 categorize patients by kidney function at baseline.  
52  
53  
54  
55  
56  
57  
58  
59  
60



**Definition of INR Control:**

To examine adequacy of anticoagulation, we examined the frequency of INR monitoring and results over subsequent timeframes. We excluded INRs done during the initialization phase for warfarin (defined as first 30 days after the first warfarin prescription after diagnosis of NVAF) and after setting time zero as day 31, we used the outpatient INR values in months 1-6 after the initial prescription to classify patients as having “good control” (TTR  $\geq$ 65%) or suboptimal control (TTR <65%). We calculated TTR using the method of Rosendaal, which incorporates both the frequency of INR measurement and the actual values to interpolate daily INR values and define the percentage of time in range for each patient.[7] We also examined the frequency of extreme INR values (<1.5 or >4.0 as previously defined in the literature[8]) – in order to not falsely attribute periods during which warfarin was deliberately held for surgical or diagnostic procedures or acute illnesses, we excluded all values drawn within one week before or after a hospital visit (in Alberta virtually all biopsy procedures or surgeries are done in publically funded hospital settings and thus captured in the discharge abstract database or the national ambulatory care reporting system).

**Follow-up:**

We followed all study participants for 18 months from the time they met the warfarin-treated NVAF case definition or until they stopped warfarin, they left the province, died, or March 31 2015 – whichever came first.

**Statistical Analysis:**

All analyses were completed in Stata/MP 13.1 ([www.stata.com](http://www.stata.com)). Descriptive statistics were reported as counts and percentages, or medians and inter-quartile

1  
2  
3 ranges, as appropriate. TTR is reported at 1-6, 7-12, and 13-18 months. In order to  
4  
5 examine the association between TTR at 1-6 months with TTR at 7-12 months and 13-  
6  
7 18 months, we used logistic regression. Outcomes were regressed on age (categorized  
8  
9 as 65-74, 75-84, and  $\geq 85$  years), sex, rural or urban residence, eGFR ( $\geq 60$ , 45-59, 30-  
10  
11 44,  $< 30$  mL/min\*1.73m<sup>2</sup>) and comorbidities (prior myocardial infarction, prior stroke or  
12  
13 transient ischemic attack, alcohol misuse, metastatic cancers, non-metastatic cancers,  
14  
15 chronic heart failure, chronic pulmonary disease, cirrhosis, dementia, diabetes mellitus,  
16  
17 epilepsy, hypertension, peptic ulcer disease, peripheral vascular disease). McFadden's  
18  
19 pseudo R<sup>2</sup> ([http://stats.idre.ucla.edu/other/mult-pkg/faq/general/faq-what-are-pseudo-r-](http://stats.idre.ucla.edu/other/mult-pkg/faq/general/faq-what-are-pseudo-r-squareds/)  
20  
21 [squareds/](http://stats.idre.ucla.edu/other/mult-pkg/faq/general/faq-what-are-pseudo-r-squareds/)) and the likelihood ratio test were used to compare models with and without  
22  
23 adjustment for good control in the first 6 months. P <0.05 was considered statistically  
24  
25 significant.  
26  
27  
28  
29  
30

## 31 RESULTS:

32  
33  
34 Of 81,775 patients with NVAf dispensed warfarin (Figure 1), 34,818 (42.6%) did  
35  
36 not have at least 3 INRs measured in months 1-6. Of the 46,957 who did have at least  
37  
38 3 INRs measured in months 1-6 (median number of INRs 10, IQR 6-16), 38,888  
39  
40 (82.8%) demonstrated good control (TTR  $\geq 65\%$ ), and 8069 (17.2%) had suboptimal  
41  
42 control (at least 3 INRs drawn but TTR  $< 65\%$ ). Longer term, of the 38,888 patients who  
43  
44 demonstrated good control in the first 6 months, 28,501 (88.9% of those who remained  
45  
46 on warfarin) exhibited TTR  $\geq 65\%$  in months 7-12 and 24,447 (89.8% of continuing  
47  
48 warfarin users) had TTR  $\geq 65\%$  in months 13-18. Of the 34,818 patients having less  
49  
50 than 3 INRs measured in months 1-6 after starting warfarin, 17,756 had refills for  
51  
52 warfarin extending beyond 7 months – as warfarin may be ingested differently than  
53  
54  
55  
56  
57  
58  
59  
60

1  
2  
3 prescribed, we cannot tell exactly when the other 17,062 patients actually stopped  
4 taking warfarin.  
5  
6

7  
8 Patients were more likely to have good INR control in months 1-6 if they lived in a  
9 rural area, had a higher CHADS score (with a higher frequency of heart failure and  
10 hypertension but not diabetes or prior stroke), or were older – Tables 1 and 2.  
11  
12

13 Predisposing factors to suboptimal INR control were cirrhosis, cancer, alcohol misuse,  
14 dementia, and atherosclerotic vascular disease (prior MI or peripheral vascular  
15 disease). It is worth noting that renal function had minimal if any impact on TTR in any  
16 time period as the proportion of patients with TTR of 65% or greater did not differ  
17 substantially across eGFR strata (Figure 2) in the 1-6 month (ranging from 50.2% to  
18 56.6%), 7-12 month (ranging from 61.2% to 63.8%), or 13-18 month (from 64.2% to  
19 67.2% range) timeframes. It is also noteworthy that patients with CHADS scores of 2 or  
20 more had a higher frequency of INR measurements (median 13 [IQR 7-23] during  
21 months 1-6 and median 9 [IQR 5-15] in months 7-18) than patients with CHADS scores  
22 of 1 or 0 (median 10 [IQR 6-14] during months 1-6 and median 7 [IQR 4-11] in months 7-  
23 18).  
24  
25  
26  
27  
28  
29  
30  
31  
32  
33  
34  
35  
36  
37  
38  
39

40 Of the 38,888 patients exhibiting good INR control during months 1-6, 28,501  
41 (88.9% of those who remained on warfarin) continued to meet the definition of good INR  
42 control over months 7-12 (median number of INR measurements 10, IQR 6,15) and  
43 24,447 (89.8% of those who remained on warfarin in that timeframe) met the definition  
44 for months 13-18 – Table 3. Good control in the first 6 months explained a significant  
45 amount of the variation in subsequent achievement of good control (Pseudo R<sup>2</sup> 0.280,  
46 Likelihood Ratio Test p<0.001 for months 7-12 and Pseudo R<sup>2</sup> 0.216, Likelihood Ratio  
47  
48  
49  
50  
51  
52  
53  
54  
55  
56  
57  
58  
59  
60

1  
2  
3 Test  $p < 0.001$  for months 13-18) and exhibited reasonable discrimination for good  
4 control over the subsequent year (c index 0.785 [95% CI 0.778-0.792] for months 7-12  
5 and c index 0.756 [95% CI 0.749-0.763] for months 13-18). Of the 32,074 patients  
6 exhibiting good INR control in 1-6 months and who continued on warfarin past 6  
7 months, 12,238 (38.2%) had at least one extreme INR value ( $< 1.5$  or  $> 4.0$ ) in the  
8 subsequent year. After exclusion of values drawn within one week before or after a  
9 hospital visit, this proportion was 31.8%.

10  
11  
12 Of the 42,887 patients who either had insufficient INR monitoring or exhibited  
13 suboptimal INR control during the first 6 months, 3025 (15.5% of those who remained  
14 on warfarin) met the definition of good INR control for months 7-12 and 3810 (22.9% of  
15 those who remained on warfarin during that timeframe) for months 13-18 – Table 3.

## 26 27 28 **DISCUSSION**

29  
30  
31 We found that although over 40% of NVAF patients dispensed warfarin had less  
32 than 3 INRs measured in months 1-6 (with approximately half of these patients stopping  
33 warfarin at some point in that first 6 months), 83% of those that had regular INR  
34 measurements exhibited TTR of 65% or better. Moreover, nearly 90% of those patients  
35 with good control in their first 6 months of warfarin therapy continued to exhibit good  
36 control over the subsequent 6 and 12 months. It is reassuring that patients with higher  
37 CHADS scores were more likely to have INRs measured and more likely to be in target  
38 range, suggesting that clinicians (and patients) were appropriately more rigorous in their  
39 approach with higher risk patients. Our finding that patients with cirrhosis, cancer,  
40 alcohol misuse, and dementia were less likely to have INRs in target range is not  
41 surprising as all are factors known to negatively impact medication adherence (as are  
42  
43  
44  
45  
46  
47  
48  
49  
50  
51  
52  
53  
54  
55  
56  
57  
58  
59  
60

1  
2  
3 other factors such as malnutrition, fluctuating liver function, etc which are not captured  
4 by administrative databases). Finally, our finding that INR control and stability differed  
5  
6 little across eGFR strata provides some reassurance for those concerned that it is more  
7  
8 difficult to achieve good INR control in patients with reduced kidney function.  
9  
10

11  
12 Although there is a published prediction score for identifying patients who are  
13 more likely to have poor INR control[15], this includes factors (such as ethnicity or  
14 tobacco use) which cannot be derived from administrative data and thus it has limited  
15 utility for comparative effectiveness research. Practitioner and health care system  
16 factors are also predictors of suboptimal TTR ratios in the literature.[9,10]  
17  
18  
19  
20  
21  
22  
23

24 While our TTR and INR stability results are much higher than reported from  
25 ORBIT-AF in the US,[8] our findings are close to the levels of control reported in the  
26 Veterans Health Administration[10] and a recent Swedish nationwide study.[16]  
27 Although we suspect that the higher degree of INR control and better maintenance of  
28 that control over time in our cohort and the Swedish and VA studies reflects better  
29 integration and continuity of primary care in those 3 settings, this cannot be definitively  
30 answered in observational studies such as these. However, results from a recent audit  
31 of 474 primary care physicians in Canada would support this contention as the median  
32 TTR for warfarin-treated AF patients who had regular primary care physician follow-up  
33 was 75%.[17]  
34  
35  
36  
37  
38  
39  
40  
41  
42  
43  
44  
45  
46  
47

48 Although we were able to link inpatient and outpatient administrative data,  
49 prescribing data, and outpatient laboratory data to examine INR control for NVAF  
50 patients in an entire Canadian province whether they were treated by primary care  
51 physicians or specialists, thus avoiding the potential selection biases that many AF  
52  
53  
54  
55  
56  
57  
58  
59  
60

1  
2  
3 registries are prone to, there are some limitations to our analysis. First, as we focused  
4 on patients newly initiated on warfarin, some may argue that this would artificially inflate  
5 their INR variability; however, we excluded inpatient and outpatient INRs drawn within  
6 the first 30 days of warfarin dispensation. Second, we assumed the target INR ranges  
7 were 2-3 for all patients, but recognize that for a small proportion of NVAF patients a  
8 higher (or lower) range may be targeted clinically if patients have had thromboembolic  
9 (or bleeding) events when INR was between 2 and 3. Third, we focused solely on INR  
10 control and didn't examine clinical endpoints and any association with out of range  
11 values, although other studies have demonstrated a clear relation between out of range  
12 INRs and bleeding or thromboembolic events.[4-6,16] It is important to acknowledge  
13 that some patients may still have events even if well anticoagulated, which may merely  
14 reflect the expected rate of noncardioembolic strokes in patients of the same age, sex,  
15 and comorbidity profile without NVAF rather than failure of anticoagulant treatment.[18]  
16  
17  
18  
19  
20  
21  
22  
23  
24  
25  
26  
27  
28  
29  
30  
31  
32  
33

34 While many of the early quality improvement studies in NVAF focused on  
35 warfarin dosing algorithms,[19,20] more recent studies[21] have highlighted the  
36 contribution of gaps in laboratory monitoring to suboptimal warfarin management –  
37 indeed we also found that a large subset of patients did not have sufficient INR values  
38 measured to calculate TTR. Our findings support the emphasis in current quality  
39 improvement efforts[22] to not only increase the use of dosing algorithms but to also  
40 encourage regular monitoring of INRs. Our findings also support those who argue for  
41 choosing a direct oral anticoagulant as the first agent for patients with NVAF given that  
42 future adherence with monitoring cannot accurately be predicted. However, our findings  
43 challenge the assumption that patients who have been well controlled on warfarin in  
44  
45  
46  
47  
48  
49  
50  
51  
52  
53  
54  
55  
56  
57  
58  
59  
60

1  
2  
3 clinical practice will exhibit deteriorating control over time - one of the key arguments  
4  
5 advanced in favour of switching from warfarin to the direct oral anticoagulants in  
6  
7 chronically treated patients. We would agree with the authors of a recent nationwide  
8  
9 audit from Sweden that “well-managed warfarin therapy...is still a valid alternative for  
10  
11 prophylaxis of AF-associated stroke.”[16]  
12  
13  
14  
15  
16  
17  
18  
19  
20  
21  
22  
23  
24  
25  
26  
27  
28  
29  
30  
31  
32  
33  
34  
35  
36  
37  
38  
39  
40  
41  
42  
43  
44  
45  
46  
47  
48  
49  
50  
51  
52  
53  
54  
55  
56  
57  
58  
59  
60

For peer review only

**ACKNOWLEDGEMENTS:**

The authors of this report are grateful to Sophanny Tiv for database development. This study is based in part by data provided by Alberta Health and Alberta Health Services.

The interpretation and conclusions are those of the researchers and do not represent the views of the Government of Alberta or Alberta Health Services. Neither the Government of Alberta nor, Alberta Health or Alberta Health Services express any opinion in relation to this study.

**FUNDING AND COMPETING INTEREST STATEMENT:**

All authors have completed the *Unified Competing Interest form* (available on request from the corresponding author) and declare: no relevant conflicts of interest; no financial relationships with any organisations that might have an interest in the submitted work in the previous three years, and no other relationships or activities that could appear to have influenced the submitted work. This work was supported by a peer-reviewed operating grant from the Heart and Stroke Foundation of Canada, GIA-15-0008887. FM is supported by a career salary award from Alberta Innovates-Health Solutions and holds the University of Alberta Chair in Cardiovascular Outcomes Research. The funders had no role in the design or analysis of this study, nor in the drafting or approval of this manuscript.

**CONTRIBUTORS:** FM conceived the study concept and design; NW and BH were involved in acquisition of the data; NW did the analyses; FM wrote the first draft of the manuscript; all authors reviewed and revised the manuscript for intellectual content. FM



1  
2  
3 and NW have access to all the data in the study and take responsibility for the integrity  
4  
5 of the data and the accuracy of the data analysis.  
6  
7

8 **GUARANTOR:** Dr. McAlister is the guarantor for this manuscript and has the right  
9  
10 to grant on behalf of all authors and does grant on behalf of all authors, an exclusive  
11  
12 licence (or non exclusive for government employees) on a worldwide basis to the BMJ  
13  
14 Publishing Group Ltd to permit this article (if accepted) to be published in BMJ editions  
15  
16 and any other BMJ PGL products and sublicences such use and exploit all subsidiary  
17  
18 rights, as set out in our licence  
19  
20  
21

22 **TRANSPARENCY DECLARATION:** Dr. McAlister affirms that the manuscript is an  
23  
24 honest, accurate, and transparent account of the study being reported; that no important  
25  
26 aspects of the study have been omitted; and that any discrepancies from the study as  
27  
28 planned (and, if relevant, registered) have been explained.  
29  
30  
31

32 **DATA SHARING:** no additional data available.  
33  
34  
35  
36  
37  
38  
39  
40  
41  
42  
43  
44  
45  
46  
47  
48  
49  
50  
51  
52  
53  
54  
55  
56  
57  
58  
59  
60

## REFERENCES

1. Wan Y, Heneghan C, Perera R, Roberts N, Hollowell J, Glasziou P, et al. Anticoagulation control and prediction of adverse events in patients with atrial fibrillation. A systematic review. *Circ Cardiovasc Qual Outcomes* 2008;1:84-91.
2. Evans A, Kalra L. Are the results of randomized controlled trials on anticoagulation in patients with atrial fibrillation generalizable to clinical practice? *Arch Intern Med* 2001;161:1443-1447.
3. Go AS, Hylek EM, Chang Y, Phillips KA, Henault LE, Capra AM, et al. Anticoagulation therapy for stroke prevention in atrial fibrillation. How well do randomized trials translate into clinical practice? *JAMA* 2003;290:2685-2692.
4. Connolly SJ, Pogue J, Eikelboom J, Flaker G, Commerford P, Franzosi MG, et al for the ACTIVE W Investigators. Benefit of oral anticoagulant over antiplatelet therapy in atrial fibrillation depends on the quality of International Normalized Ratio control achieved by centers and countries as measured by time in therapeutic range. *Circulation* 2008;118:2029-2037.
5. White HD, Gruber M, Feyzi J, Kaatz S, Tse H, Husted S, Albers GW. Comparison of outcomes among patients randomized to Warfarin therapy according to anticoagulant control. *Arch Intern Med* 2007;167-:239-245.
6. Veeger NJGM, Piersma-Wichers M, Tijssen JGP, Hillege HL, van der Meer J. Individual time within target range in patients treated with vitamin K antagonists: main determinant of quality of anticoagulation and predictor of clinical outcome. A retrospective study of 2300 consecutive patients with venous thromboembolism. *Brit J Haematology* 2005;128:513–519.

- 1  
2  
3  
4  
5  
6  
7  
8  
9  
10  
11  
12  
13  
14  
15  
16  
17  
18  
19  
20  
21  
22  
23  
24  
25  
26  
27  
28  
29  
30  
31  
32  
33  
34  
35  
36  
37  
38  
39  
40  
41  
42  
43  
44  
45  
46  
47  
48  
49  
50  
51  
52  
53  
54  
55  
56  
57  
58  
59  
60
7. Rosendaal FR, Cannegieter SC, van der Meer FJM, Briet E. A method to determine the optimal intensity of oral anticoagulant therapy. *Thromb Haemost* 1993; 29:236-239.
8. Pokorney SD, Simon DS, Thomas L, Gersh BJ, Hylek EM, Piccini JP, Peterson ED. Stability of international normalized ratios in patients taking long-term warfarin therapy. *JAMA* 2016;316:661-663.
9. Singer DE, Hellkamp AS, Piccini JP, Mahaffey KW, Lokhnygina Y, Pan G, et al. Impact of global geographic region on time in therapeutic range on warfarin anticoagulant therapy: data from the ROCKET AF clinical trial. *J Am Heart Assoc* 2013;2:e000067.
10. Rose AJ, Hylek EM, Ozonoff A, Ash AS, Reisman JI, Berlowitz DR. Risk-Adjusted percent time in therapeutic range as a quality indicator for outpatient oral anticoagulation. Results of the veterans affairs study to improve anticoagulation (VARIA). *Circ Cardiovasc Qual Outcomes* 2011;4:22-29.
11. McAlister FA, Wiebe N, Jun M, Sandhu R, James MT, McMurtry SM, et al. Are existing risk scores for non-valvular atrial fibrillation useful for prediction or risk adjustment in patients with chronic kidney disease? *Can J Cardiol* 2017;33:243-252.
12. Jensen PN, Johnson K, Floyd J, Heckbert SR, Carnahan R, Dublin S. A systematic review of validated methods for identifying atrial fibrillation using administrative data. *Pharmacoepi & Drug Safety* 2012;21(S1):141-147.

- 1  
2  
3  
4 13. Qua, H, Sundararajan V, Halfon P, Fong A, Burnand B, Luthi JC, et al. Coding  
5 algorithms for defining comorbidities in ICD-9-CM and ICD-10 administrative  
6 data. *Med Care* 2005;43:1130-1139.  
7  
8  
9  
10  
11 14. Tonelli M, Wiebe N, Fortin M, Guthrie B, Hemmelgarn BR, James MT, et al. for  
12 the Alberta Kidney Disease Network. Methods for identifying 30 chronic  
13 conditions: application to administrative data. *BMC Medical Informatics and*  
14 *Decision Making* 2015;15:31. DOI 10.1186/s12911-015-0155-5  
15  
16  
17  
18  
19  
20 15. Apostolakis S, Sullivan RM, Olshansky B, Lip GYH. Factors affecting quality of  
21 anticoagulation control among patients with atrial fibrillation on Warfarin - the  
22 SAME-TT<sub>2</sub>R<sub>2</sub> Score. *CHEST* 2013;144:1555–1563.  
23  
24  
25  
26  
27 16. Björck F, Renlund H, Lip GYH, Wester P, Svensson PJ, Själander A. Outcomes  
28 in a warfarin-treated population with atrial fibrillation. *JAMA Cardiol* 2016;1:172-  
29 180.  
30  
31  
32  
33  
34 17. Angaran P, Dorian P, Tan MK, Kerr CR, Green MS, Gladstone DJ, et al. The risk  
35 stratification and stroke prevention therapy care gap in Canadian atrial fibrillation  
36 patients. *Can J Cardiol* 2016;32:336–343.  
37  
38  
39  
40  
41 18. Freedman B, Martinez C, Katholing A, Rietbrock S. Residual risk of stroke and  
42 death in anticoagulant-treated patients with atrial fibrillation. *JAMA Cardiol*  
43 2016;1:366-368.  
44  
45  
46  
47  
48 19. Sandhu RK, McAlister FA. Stroke prevention for patients with atrial fibrillation:  
49 improving but not perfect yet. *Heart* 2013;99:1141-42.  
50  
51  
52  
53 20. Van Spall HGC, Wallentin L, Yusuf S, Eikelboom JW, Nieuwlatt R, Yang S, et al.  
54 Variation in Warfarin Dose Adjustment Practice Is Responsible for Differences in  
55  
56  
57  
58  
59  
60

1  
2  
3 the Quality of Anticoagulation Control Between Centers and Countries.

4  
5 Circulation 2012;126:2309-2316.

6  
7  
8 21. Rose AJ, Miller DR, Ozonoff A, Berlowitz DR, Ash AS, Zhao S, et al. Gaps in  
9  
10 monitoring during oral anticoagulation: insights into care transitions, monitoring  
11  
12 barriers, and medication nonadherence. Chest 2013;143:751-757.

13  
14  
15 22. Rose AJ, Park A, Gillespie C, Van Deusen Lukas C, Ozonoff A, Petrakis BA, et  
16  
17 al. Results of a regional effort to improve warfarin management. Ann  
18  
19 Pharmacother 2016;(published online early)  
20  
21  
22  
23  
24  
25  
26  
27  
28  
29  
30  
31  
32  
33  
34  
35  
36  
37  
38  
39  
40  
41  
42  
43  
44  
45  
46  
47  
48  
49  
50  
51  
52  
53  
54  
55  
56  
57  
58  
59  
60

1  
2  
3 **Figure Legends:**  
4  
5  
6

7 **Figure 1: Participant flow**  
8

9  
10 **Figure 2. Proportion of patients with Time in Therapeutic Range  $\geq$  65% in different**  
11 **timeframes, broken down by estimated glomerular filtration rate**  
12  
13

14  
15  
16  
17  
18  
19  
20  
21  
22  
23  
24  
25  
26  
27  
28  
29  
30  
31  
32  
33  
34  
35  
36  
37  
38  
39  
40  
41  
42  
43  
44  
45  
46  
47  
48  
49  
50  
51  
52  
53  
54  
55  
56  
57  
58  
59  
60

For peer review only

**Table 1. Baseline characteristics by time in therapeutic range in months 1-6 of warfarin use**

|                                     | Overall<br>(n=81,775) | Time in<br>Therapeutic<br>Range <65% or<br>infrequent INRs<br>(n=42,887) | Time in<br>Therapeutic<br>Range ≥65%<br>(n=38,888) | P value |
|-------------------------------------|-----------------------|--------------------------------------------------------------------------|----------------------------------------------------|---------|
| Age, yrs                            | 76 (66,82)            | 75 (64,82)                                                               | 76 (66,82)                                         | <0.001  |
| Female                              | 36,764 (45.0)         | 18,267 (44.1)                                                            | 18,497 (45.9)                                      | <0.001  |
| Rural residence                     | 10,545 (12.9)         | 4,423 (10.7)                                                             | 6,122 (15.2)                                       | <0.001  |
| CHADS <sub>2</sub> score            | 2 (1,4)               | 2 (1,4)                                                                  | 3 (2,4)                                            | <0.001  |
| Prior myocardial infarction         | 13,134 (16.1)         | 7,479 (18.0)                                                             | 5,655 (14.0)                                       | <0.001  |
| Prior stroke/TIA                    | 22,712 (27.8)         | 11,628 (28.0)                                                            | 11,084 (27.5)                                      | 0.08    |
| Alcohol use disorder                | 5,332 (6.5)           | 3,410 (8.2)                                                              | 1,922 (4.8)                                        | <0.001  |
| Cancer, metastatic                  | 3,415 (4.2)           | 2,192 (5.3)                                                              | 1,223 (3.0)                                        | <0.001  |
| Cancer, non-metastatic <sup>1</sup> | 8,543 (10.5)          | 4,847 (11.7)                                                             | 3,696 (9.2)                                        | <0.001  |
| Chronic heart failure               | 33,139 (40.5)         | 16,076 (38.8)                                                            | 17,063 (42.3)                                      | <0.001  |
| Chronic pulmonary disease           | 28,036 (34.3)         | 14,672 (35.4)                                                            | 13,364 (33.2)                                      | <0.001  |
| Cirrhosis                           | 807 (1.0)             | 533 (1.3)                                                                | 274 (0.7)                                          | <0.001  |
| Dementia                            | 10,111 (12.4)         | 5,438 (13.1)                                                             | 4,673 (11.6)                                       | <0.001  |
| Diabetes mellitus                   | 24,643 (30.1)         | 12,545 (30.3)                                                            | 12,098 (30.0)                                      | 0.45    |
| eGFR, mL/min*1.73m <sup>2</sup>     | 65 (48,81)            | 66 (48,82)                                                               | 64 (48,79)                                         | <0.001  |
| Epilepsy                            | 2,666 (3.3)           | 1,644 (4.0)                                                              | 1,022 (2.5)                                        | <0.001  |
| Hypertension                        | 66,290 (81.1)         | 33,420 (80.6)                                                            | 32,870 (81.5)                                      | 0.001   |
| Peptic ulcer disease                | 1,007 (1.2)           | 606 (1.5)                                                                | 401 (1.0)                                          | <0.001  |
| Peripheral vascular disease         | 5,260 (6.4)           | 2,905 (7.0)                                                              | 2,355 (5.8)                                        | <0.001  |

N (%) or median (IQR) as appropriate

<sup>1</sup>Specifically breast, cervical, colorectal, lung, and prostate

CHADS<sub>2</sub> Congestive Heart Failure, Hypertension, Age, Diabetes, Stroke/Transient Ischemic Attack;

eGFR estimated glomerular filtration rate; TIA transient ischemic attack

Table 2. Adjusted odds ratios associated with time in therapeutic range

|                                     | 7-12 months<br>(n=24,030)<br>aOR (95% CI) | 13-18 months<br>(n=21,556)<br>aOR (95% CI) |
|-------------------------------------|-------------------------------------------|--------------------------------------------|
| TTR during months 1-6               | 48.50 (42.58,55.24)                       | 27.81 (24.51,31.57)                        |
| Age, yrs                            |                                           |                                            |
| 65-74                               | 1.00                                      | 1.00                                       |
| 75-84                               | 1.48 (1.35,1.63)                          | 1.73 (1.58,1.90)                           |
| ≥85                                 | 1.79 (1.63,1.97)                          | 2.06 (1.88,2.25)                           |
| Female                              | 0.97 (0.90,1.04)                          | 0.99 (0.93,1.06)                           |
| Rural residence                     | 1.04 (0.95,1.15)                          | 1.09 (1.00,1.20)                           |
| Prior myocardial infarction         | 0.63 (0.57,0.69)                          | 0.65 (0.60,0.72)                           |
| Prior stroke/TIA                    | 1.18 (1.09,1.28)                          | 1.15 (1.07,1.25)                           |
| Alcohol misuse                      | 0.68 (0.59,0.79)                          | 0.72 (0.62,0.84)                           |
| Cancer, metastatic                  | 0.62 (0.51,0.74)                          | 0.80 (0.65,0.98)                           |
| Cancer, non-metastatic <sup>1</sup> | 0.87 (0.78,0.98)                          | 0.79 (0.71,0.89)                           |
| Chronic heart failure               | 1.29 (1.20,1.38)                          | 1.34 (1.25,1.43)                           |
| Chronic pulmonary disease           | 1.03 (0.96,1.11)                          | 1.02 (0.95,1.10)                           |
| Cirrhosis                           | 0.72 (0.53,1.00)                          | 0.72 (0.52,1.01)                           |
| Dementia                            | 0.86 (0.76,0.97)                          | 0.79 (0.70,0.88)                           |
| Diabetes mellitus                   | 0.96 (0.90,1.04)                          | 0.99 (0.92,1.06)                           |
| eGFR, mL/min*1.73m <sup>2</sup>     |                                           |                                            |
| ≥60                                 | 1.00                                      | 1.00                                       |
| 45-59                               | 1.11 (1.01,1.21)                          | 1.13 (1.04,1.23)                           |
| 30-44                               | 1.08 (0.97,1.21)                          | 1.10 (0.99,1.22)                           |
| <30                                 | 1.02 (0.87,1.18)                          | 1.00 (0.85,1.16)                           |
| Epilepsy                            | 0.95 (0.77,1.18)                          | 0.96 (0.78,1.19)                           |
| Hypertension                        | 1.37 (1.24,1.50)                          | 1.29 (1.17,1.41)                           |
| Peptic ulcer disease                | 0.62 (0.46,0.82)                          | 0.67 (0.49,0.90)                           |
| Peripheral vascular disease         | 0.96 (0.84,1.11)                          | 0.98 (0.85,1.13)                           |

<sup>1</sup>Specifically breast, cervical, colorectal, lung, and prostate

CI confidence interval, eGFR estimated glomerular filtration rate, TIA transient ischemic attack, TTR time in therapeutic range



Table 3. INR control (N=81,775)

|                                                  | <3 INRs in<br>months 1-6<br>(n=34,818) | TTR <65% in<br>months 1-6<br>(n=8,069) | TTR ≥65% in<br>months 1-6<br>(n=38,888) |
|--------------------------------------------------|----------------------------------------|----------------------------------------|-----------------------------------------|
| 7-12 months:<br>-still on warfarin<br>-TTR ≥65%  | 17,756 (51.0)<br>2,508 (14.1)          | 1,801 (22.3)<br>517 (28.7)             | 32,074 (82.5)<br>28,501 (88.9)          |
| 13-18 months:<br>-still on warfarin<br>-TTR ≥65% | 15,289 (43.9)<br>3,264 (21.4)          | 1,353 (16.8)<br>546 (40.4)             | 27,228 (70.0)<br>24,447 (89.8)          |

Figure 1. Participant flow

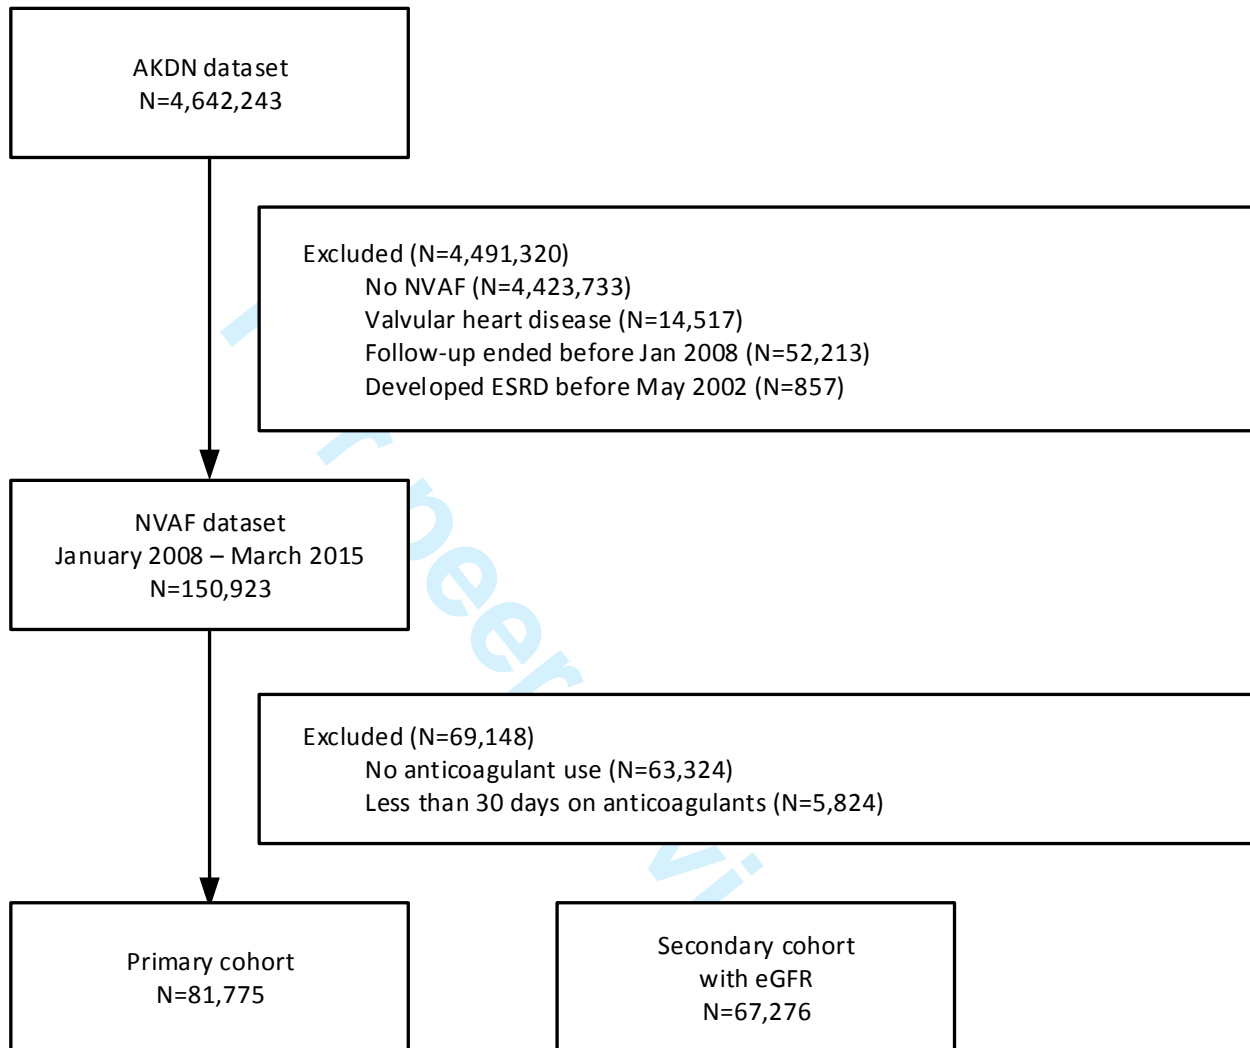

AKDN Alberta Kidney Disease Network (dataset containing administrative records for all 4.6 million Albertans), eGFR estimated glomerular filtration rate, ESRD end-stage renal disease, NVAF non-valvular atrial fibrillation

Figure 2. Proportion of patients with Time in Therapeutic Range  $\geq 65\%$  in different timeframes, broken down by estimated glomerular filtration rate

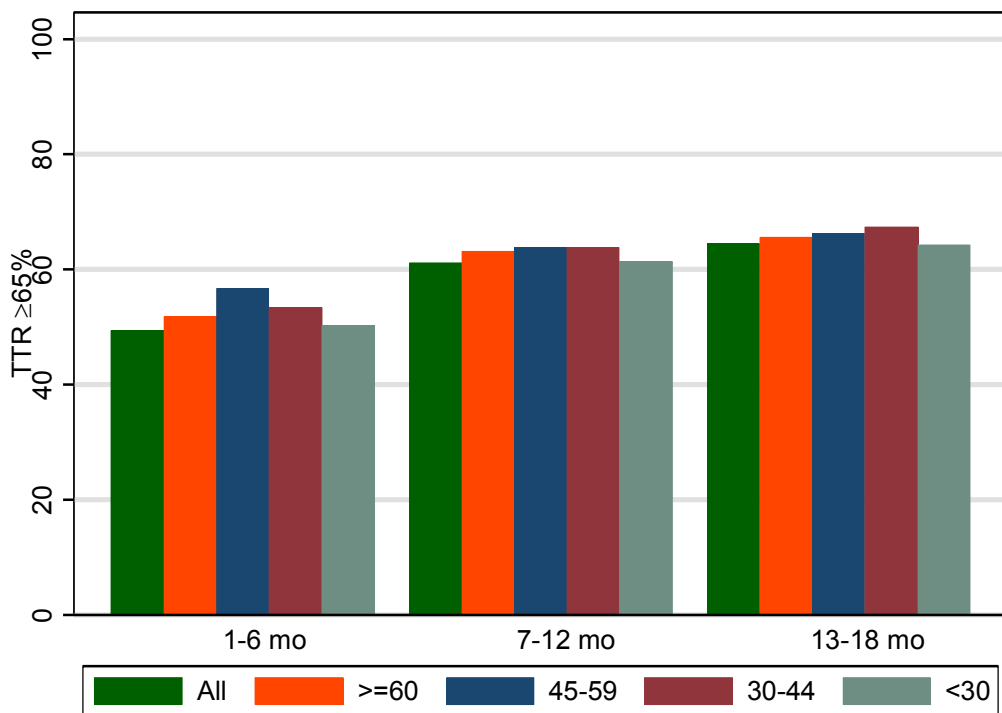

INR international normalized ratio, GFR glomerular filtration rate, TTR time in therapeutic range

The height of the bars shows the percentage of participants that meet target in each 6-month interval of follow-up. The green bars represent all participants (followed and on anticoagulants) including those without estimated GFR in the first 6 months. The remaining four colors represents participants with varying levels of estimated GFR (mL/min\*1.73m<sup>2</sup>) in the first 6 months.

STROBE 2007 (v4) Statement— for McAlister et al. TIME IN THERAPEUTIC RANGE AND STABILITY OVER TIME FOR WARFARIN USERS IN CLINICAL PRACTICE: AN  
OBSERVATIONAL STUDY USING LINKED ROUTINELY COLLECTED HEALTH DATA

| Section/Topic                | Item # | Recommendation                                                                                                                                                                       | Reported on page # |
|------------------------------|--------|--------------------------------------------------------------------------------------------------------------------------------------------------------------------------------------|--------------------|
| Title and abstract           | 1      | (a) Indicate the study's design with a commonly used term in the title or the abstract                                                                                               | 1                  |
|                              |        | (b) Provide in the abstract an informative and balanced summary of what was done and what was found                                                                                  | 2                  |
| <b>Introduction</b>          |        |                                                                                                                                                                                      |                    |
| Background/rationale         | 2      | Explain the scientific background and rationale for the investigation being reported                                                                                                 | 5-6                |
| Objectives                   | 3      | State specific objectives, including any prespecified hypotheses                                                                                                                     | 6                  |
| <b>Methods</b>               |        |                                                                                                                                                                                      |                    |
| Study design                 | 4      | Present key elements of study design early in the paper                                                                                                                              | 2, 6               |
| Setting                      | 5      | Describe the setting, locations, and relevant dates, including periods of recruitment, exposure, follow-up, and data collection                                                      | 2, 6-8             |
| Participants                 | 6      | (a) Give the eligibility criteria, and the sources and methods of selection of participants. Describe methods of follow-up                                                           | 2, 7               |
|                              |        | (b) For matched studies, give matching criteria and number of exposed and unexposed                                                                                                  | n/a                |
| Variables                    | 7      | Clearly define all outcomes, exposures, predictors, potential confounders, and effect modifiers. Give diagnostic criteria, if applicable                                             | 7-8                |
| Data sources/<br>measurement | 8*     | For each variable of interest, give sources of data and details of methods of assessment (measurement). Describe comparability of assessment methods if there is more than one group | 7-8                |
| Bias                         | 9      | Describe any efforts to address potential sources of bias                                                                                                                            | 6                  |
| Study size                   | 10     | Explain how the study size was arrived at                                                                                                                                            | n/a                |
| Quantitative variables       | 11     | Explain how quantitative variables were handled in the analyses. If applicable, describe which groupings were chosen and why                                                         | 8-9                |
| Statistical methods          | 12     | (a) Describe all statistical methods, including those used to control for confounding                                                                                                | 8-9                |
|                              |        | (b) Describe any methods used to examine subgroups and interactions                                                                                                                  | 8-9                |
|                              |        | (c) Explain how missing data were addressed                                                                                                                                          | 8-9                |

|                          |     |                                                                                                                                                                                                              |                                |
|--------------------------|-----|--------------------------------------------------------------------------------------------------------------------------------------------------------------------------------------------------------------|--------------------------------|
|                          |     | (d) If applicable, explain how loss to follow-up was addressed                                                                                                                                               | 8                              |
|                          |     | (e) Describe any sensitivity analyses                                                                                                                                                                        | 8-9                            |
| <b>Results</b>           |     |                                                                                                                                                                                                              |                                |
| Participants             | 13* | (a) Report numbers of individuals at each stage of study—eg numbers potentially eligible, examined for eligibility, confirmed eligible, included in the study, completing follow-up, and analysed            | 9 and figure 1                 |
|                          |     | (b) Give reasons for non-participation at each stage                                                                                                                                                         | Figure 1                       |
|                          |     | (c) Consider use of a flow diagram                                                                                                                                                                           | Figure 1                       |
| Descriptive data         | 14* | (a) Give characteristics of study participants (eg demographic, clinical, social) and information on exposures and potential confounders                                                                     | Table 1                        |
|                          |     | (b) Indicate number of participants with missing data for each variable of interest                                                                                                                          | Table 1                        |
|                          |     | (c) Summarise follow-up time (eg, average and total amount)                                                                                                                                                  | 9                              |
| Outcome data             | 15* | Report numbers of outcome events or summary measures over time                                                                                                                                               | 9-11, Tables 2 and 3, Figure 2 |
| Main results             | 16  | (a) Give unadjusted estimates and, if applicable, confounder-adjusted estimates and their precision (eg, 95% confidence interval). Make clear which confounders were adjusted for and why they were included | 9-11, Tables 2 and 3, Figure 2 |
|                          |     | (b) Report category boundaries when continuous variables were categorized                                                                                                                                    | 9-11, Tables 2 and 3, Figure 2 |
|                          |     | (c) If relevant, consider translating estimates of relative risk into absolute risk for a meaningful time period                                                                                             | n/a                            |
| Other analyses           | 17  | Report other analyses done—eg analyses of subgroups and interactions, and sensitivity analyses                                                                                                               | 9-11, Tables 2 and 3, Figure 2 |
| <b>Discussion</b>        |     |                                                                                                                                                                                                              |                                |
| Key results              | 18  | Summarise key results with reference to study objectives                                                                                                                                                     | 11                             |
| <b>Limitations</b>       |     |                                                                                                                                                                                                              |                                |
| Interpretation           | 20  | Give a cautious overall interpretation of results considering objectives, limitations, multiplicity of analyses, results from similar studies, and other relevant evidence                                   | 11-12, 13-14                   |
| Generalisability         | 21  | Discuss the generalisability (external validity) of the study results                                                                                                                                        | 11-12, 13-14                   |
| <b>Other information</b> |     |                                                                                                                                                                                                              |                                |
| Funding                  | 22  | Give the source of funding and the role of the funders for the present study and, if applicable, for the original study on which the present article is based                                                | 15                             |

# BMJ Open

## TIME IN THERAPEUTIC RANGE AND STABILITY OVER TIME FOR WARFARIN USERS IN CLINICAL PRACTICE: A RETROSPECTIVE COHORT STUDY USING LINKED ROUTINELY COLLECTED HEALTH DATA IN ALBERTA, CANADA

|                                 |                                                                                                                                                                     |
|---------------------------------|---------------------------------------------------------------------------------------------------------------------------------------------------------------------|
| Journal:                        | <i>BMJ Open</i>                                                                                                                                                     |
| Manuscript ID                   | bmjopen-2017-016980.R1                                                                                                                                              |
| Article Type:                   | Research                                                                                                                                                            |
| Date Submitted by the Author:   | 22-Jun-2017                                                                                                                                                         |
| Complete List of Authors:       | Mcalister, Finlay; University of Alberta, Medicine; University of Alberta Wiebe, Natasha; University of Alberta, Medicine Hemmelgarn, Brenda; University of Calgary |
| <b>Primary Subject Heading</b>: | Cardiovascular medicine                                                                                                                                             |
| Secondary Subject Heading:      | Evidence based practice, General practice / Family practice                                                                                                         |
| Keywords:                       | atrial fibrillation, warfarin, Quality in health care < HEALTH SERVICES ADMINISTRATION & MANAGEMENT                                                                 |
|                                 |                                                                                                                                                                     |

SCHOLARONE™  
Manuscripts

Bmjopen-2017-016980 (revised)

**TIME IN THERAPEUTIC RANGE AND STABILITY OVER TIME FOR WARFARIN  
USERS IN CLINICAL PRACTICE: A RETROSPECTIVE COHORT STUDY USING  
LINKED ROUTINELY COLLECTED HEALTH DATA IN ALBERTA, CANADA**

Finlay A. McAlister,<sup>1</sup> MD MSc

Natasha Wiebe,<sup>1</sup> MMath PStat

Brenda R. Hemmelgarn,<sup>2,3</sup> MD PhD

**Correspondence:**

Dr. F. McAlister, 5-134C Clinical Sciences Building,  
University of Alberta, 11350 83 Avenue, Edmonton, Alberta, Canada T6G 2G3  
Tel: (780) 492-9824 Fax: (780) 492-7277 e-mail: Finlay.McAlister@ualberta.ca

1. Faculty of Medicine and Dentistry, University of Alberta, Edmonton, Canada
2. Cumming School of Medicine, Division of Nephrology, University of Calgary, Alberta, Canada
3. Department of Community Health Sciences, University of Calgary, Calgary, Alberta, Canada

**Running Title: Stability of TTR over time**

**Keywords:** atrial fibrillation; warfarin; quality of care

**Word Count: 5310 Total, 300 Abstract, 2659 Text, 4 Tables, 3  
Figures, 24 References, 1 eAppendix**

## ABSTRACT

**Objectives:** Whether warfarin-treated patients with non-valvular atrial fibrillation (NVAF) who exhibit good control will experience deterioration in control over time is uncertain. We designed this study to examine the time in therapeutic range (TTR) in a population-based cohort of patients with NVAF recently initiated on warfarin.

**Design:** Retrospective cohort study using routinely collected health data from 2008 to 2015.

**Setting:** The Canadian province of Alberta.

**Participants:** All adults with NVAF who were taking warfarin for more than one month.

**Main Outcome Measures:** Frequency of INR monitoring and the Rosendaal TTR with time zero set at 31 days after the first warfarin dispensation.

**Results:** Of 57,669 patients with NVAF dispensed warfarin for more than one month, 17,099 (29.7%) had less than 3 INRs measured in months 1-6. Of the 40,570 that went for regular INR monitoring in months 1-6 (median number of INRs 11, IQR 7-16), 16,639 (41.0%) met the definition of good control (TTR  $\geq$ 65%); good control continued to be exhibited by 8,177 (57.1% of those who remained on warfarin) during months 7-12 and 6,804 (56.8% of continuing warfarin users) in months 13-18. Good control in the first 6 months predicted good control over the subsequent year: aOR 4.0 [95%CI 3.8-4.2], c index 0.685 [95%CI 0.679-0.691] for months 7-12 and aOR 3.2 [95%CI 3.1-3.3], c index 0.665 [95%CI 0.659-0.671] for months 13-18.



1  
2  
3 **Conclusions:** Nearly one third of warfarin-treated patients had insufficient INR  
4 monitoring - this could influence the initial choice of anticoagulant and identifies a target  
5 for future quality improvement efforts. Of those warfarin-treated patients who went for  
6 regular INR monitoring, 41% exhibited levels of control similar to that in randomized  
7 trials and this deteriorated by half over time. However, in patients who have already  
8 exhibited adherence with regular monitoring and good TTR, warfarin may still be a  
9 reliable anticoagulation option.  
10  
11  
12  
13  
14  
15  
16  
17  
18  
19  
20  
21  
22  
23  
24  
25  
26  
27  
28  
29  
30  
31  
32  
33  
34  
35  
36  
37  
38  
39  
40  
41  
42  
43  
44  
45  
46  
47  
48  
49  
50  
51  
52  
53  
54  
55  
56  
57  
58  
59  
60

## ARTICLE SUMMARY

### Strengths of this Study:

-Addresses the question of whether NVAF patients who are well controlled on warfarin could continue to be reliably anticoagulated with warfarin

-Population based study of all adults with NVAF in an entire Canadian province, with complete capture of all interactions with the health care system, prescribing data, and INR results

### Limitations of this Study:

-we assumed the target INR ranges were 2-3 for all patients, but recognize that for a small proportion of NVAF patients a higher (or lower) range may be targeted clinically

-we focused solely on INR control and didn't examine clinical endpoints

1  
2  
3  
4  
5  
6  
7  
8  
9  
10  
11  
12  
13  
14  
15  
16  
17  
18  
19  
20  
21  
22  
23  
24  
25  
26  
27  
28  
29  
30  
31  
32  
33  
34  
35  
36  
37  
38  
39  
40  
41  
42  
43  
44  
45  
46  
47  
48  
49  
50  
51  
52  
53  
54  
55  
56  
57  
58  
59  
60

Although warfarin has been shown to be efficacious in preventing stroke in non-valvular atrial fibrillation (NVAF), it's effectiveness is dependent on being in therapeutic range (INR between 2 and 3).[1-6] However, some practice based studies suggest that only a minority of patients anticoagulated in the community have an average INR between 2 and 3, with wide variability from 29% to 75%.[1,3] The time in therapeutic range (TTR) is a standard measure of warfarin control which incorporates both the frequency of INR measurement and the actual values to interpolate daily INR values and define the percentage of time in range for each patient.[7] A TTR of at least two thirds is often used as the cutpoint for defining "good INR control" since patients randomized to warfarin in the clinical trials proving the efficacy of anticoagulation had their INRs within target range 65% of the time,[2,5] a large cohort with 63% of INRs in the 2-3 range reported warfarin benefits similar to those in the randomized trials,[3] and a post-hoc analysis of the ACTIVE-W Trial demonstrated that warfarin-treated patients with  $\leq 65\%$  of their INRs between 2 and 3 had higher rates of embolic and bleeding events than antiplatelet-treated patients.[4]

One of the key arguments in favour of the direct oral anticoagulants for NVAF is that the TTR for warfarin-treated patients is unpredictable and may well be markedly lower in clinical practice than in the randomized trials proving the efficacy of warfarin. While this is certainly a rationale for choosing a direct oral anticoagulant as the first agent for a patient newly diagnosed with NVAF, as clinicians we are often faced with the issue of what to do with patients who have been well-controlled on warfarin – can such patients be left on warfarin or should we be switching them to direct oral anticoagulants?

1  
2  
3 A recent report from ORBIT-AF raised concern that even when patients initially  
4 exhibit good INR control, this may fluctuate substantially over time: they reported that  
5 only 34% of their patients with outstanding INR control (TTR 80% or more) in the first 6  
6 months of observation continued to exhibit that degree of control over the subsequent  
7 year.[8] However, as care varies widely across regions[1,9,10] and almost 80% of  
8 ORBIT-AF patients were enrolled from specialist offices, we designed this study to  
9 examine the adequacy of anticoagulation in an entire population more closely reflecting  
10 usual clinical practice where most NVAf patients are managed by primary care  
11 physicians. We examined the TTR and stability of INR control over time in a population-  
12 based cohort of adults with NVAf in a universal access health care system similar to  
13 the British National Health Service (the entire Canadian province of Alberta). As a  
14 secondary goal, we evaluated whether TTR and INR stability varied by kidney function.  
15  
16  
17  
18  
19  
20  
21  
22  
23  
24  
25  
26  
27  
28  
29  
30

## 31 **METHODS**

### 32 ***Design:***

33 Retrospective cohort study using routinely collected health data.

### 34 ***Data Sources:***

35 As described in full elsewhere,[11] we used de-identified but linked (using unique  
36 health number identifiers) Alberta Health administrative and laboratory databases  
37 including all residents of Alberta (population 4.3 million people). This project was  
38 approved by Alberta Health and the Health Research Ethics Boards at the University of  
39 Alberta and the University of Calgary with a waiver of individual signed patient consent  
40 (since data was de-identified).  
41  
42  
43  
44  
45  
46  
47  
48  
49  
50  
51  
52  
53

### 54 ***Study Sample:***

1  
2  
3  
4 The cohort consisted of all adult Albertans (aged 18 years or older) with a  
5  
6 diagnosis of AF (ICD-9 CM 427.3 or ICD-10 I48) between January 1, 2008 and March  
7  
8 31, 2015 in any fields of either the discharge abstract database (which captures most  
9  
10 responsible diagnosis and up to 24 secondary diagnoses for all acute care  
11  
12 hospitalizations), the national ambulatory care reporting system (which captures all  
13  
14 visits to emergency rooms or hospital-based specialist clinics in Alberta), or the  
15  
16 physician billing claims databases (see eAppendix for case definitions for NVAF and all  
17  
18 covariates listed below). Patients with a history of mitral or aortic valvular disease,  
19  
20 valve surgery (see eAppendix) or end-stage kidney disease (defined as documented  
21  
22 chronic dialysis or prior kidney transplant before onset of NVAF) were excluded (Figure  
23  
24 1). These NVAF case definitions have been evaluated in multiple studies, with  
25  
26 sensitivity approaching 95% and specificity 99% in those that use both inpatient and  
27  
28 outpatient data (as we did).[12] We restricted this study to patients dispensed warfarin  
29  
30 prescriptions of 30 days or longer (we linked to the Pharmacy Information Network and  
31  
32 Alberta Blue Cross to obtain all prescription dispensations for cohort patients of any  
33  
34 age). In the secondary analysis by kidney function, we restricted our analysis to only  
35  
36 those with an outpatient serum creatinine measured at least once in the 18 months after  
37  
38 the index date.  
39  
40  
41  
42  
43  
44

45  
46 **Covariates:**  
47

48 As described fully elsewhere,[11,13,14] we identified co-morbidities using the  
49  
50 ICD-9-CM or ICD-10-CA codes validated in administrative databases (with look-back  
51  
52 beginning in April 1994) and we used eGFR (calculated using the CKD-EPI equation) to  
53  
54 categorize patients by kidney function at baseline.  
55  
56  
57  
58  
59  
60

**Definition of INR Control:**

To examine adequacy of anticoagulation, we examined the frequency of INR monitoring and results over subsequent timeframes. We excluded INRs done during the initialization phase for warfarin (defined as within 30 days of the first warfarin prescription) and, after setting time zero as day 31, we used the outpatient INR values in months 1-6 after the initial prescription to classify patients as having “good control” (TTR  $\geq$ 65%) or suboptimal control (TTR <65%). We calculated TTR using the method of Rosendaal, which incorporates both the frequency of INR measurement and the actual values to interpolate daily INR values and define the percentage of time in range for each patient.[7] We also examined the frequency of extreme INR values (<1.5 or >4.0 as previously defined in the literature[8]) – in order to not falsely attribute periods during which warfarin was deliberately held for surgical or diagnostic procedures or acute illnesses, we excluded all values drawn within one week before or after a hospitalization (in Alberta all biopsy procedures or surgeries are done in publically funded hospital settings and thus captured in the discharge abstract database or the national ambulatory care reporting system).

**Follow-up:**

We followed all study participants for 18 months from the time they met the warfarin-treated NVAf case definition (ie. had been on warfarin for at least 30 days) or until they stopped warfarin, they left the province, died, or March 31 2015 – whichever came first.

**Statistical Analysis:**

All analyses were completed in Stata/MP 13.1 ([www.stata.com](http://www.stata.com)). Descriptive

1  
2  
3 statistics were reported as counts and percentages, or medians and inter-quartile  
4  
5 ranges, as appropriate. TTR is reported at 1-6, 7-12, and 13-18 months. In order to  
6  
7 examine the association between TTR at 1-6 months with TTR at 7-12 months and 13-  
8  
9 18 months, we used logistic regression. Outcomes were regressed on age (categorized  
10  
11 as 65-74, 75-84, and  $\geq 85$  years), sex, rural or urban residence, eGFR ( $\geq 60$ , 45-59, 30-  
12  
13 44,  $< 30 \text{ mL/min} \cdot 1.73 \text{ m}^2$ ) and comorbidities (prior myocardial infarction, prior stroke or  
14  
15 transient ischemic attack, alcohol misuse, metastatic cancers, non-metastatic cancers,  
16  
17 chronic heart failure, chronic pulmonary disease, cirrhosis, dementia, diabetes mellitus,  
18  
19 epilepsy, hypertension, peptic ulcer disease, peripheral vascular disease). McFadden's  
20  
21 pseudo  $R^2$  ([http://stats.idre.ucla.edu/other/mult-pkg/faq/general/faq-what-are-pseudo-r-](http://stats.idre.ucla.edu/other/mult-pkg/faq/general/faq-what-are-pseudo-r-squareds/)  
22  
23 [squareds/](http://stats.idre.ucla.edu/other/mult-pkg/faq/general/faq-what-are-pseudo-r-squareds/)) and the likelihood ratio test were used to compare models with and without  
24  
25 adjustment for good control in the first 6 months.  $P < 0.05$  was considered statistically  
26  
27 significant.  
28  
29  
30  
31  
32

### 33 **RESULTS:**

34  
35  
36 Of 57,669 patients with NVAf dispensed warfarin (Figure 1), 17,099 (29.7%) did  
37  
38 not have at least 3 INRs measured in months 1-6. Of the 40,570 who did have at least  
39  
40 3 INRs measured in months 1-6 (median number of INRs 11, IQR 7-16), 16,639  
41  
42 (41.0%) demonstrated good control (TTR  $\geq 65\%$ ), and 23,931 (59.0%) had suboptimal  
43  
44 control (at least 3 INRs drawn but TTR  $< 65\%$ ) – Figure 1. Longer term, of the 16,639  
45  
46 patients who demonstrated good control in the first 6 months, 8,177 (57.1% of those  
47  
48 who remained on warfarin) exhibited TTR  $\geq 65\%$  in months 7-12 and 6,804 (56.8% of  
49  
50 continuing warfarin users) had TTR  $\geq 65\%$  in months 13-18 (Figure 1). Of the 17,099  
51  
52 patients having less than 3 INRs measured in months 1-6 after starting warfarin, 11,653  
53  
54  
55  
56  
57  
58  
59  
60

1  
2  
3 had refills for warfarin extending beyond 7 months – as warfarin may be ingested  
4 differently than prescribed, we cannot tell exactly when (or if) the other 5,446 patients  
5  
6 with infrequent INR monitoring actually stopped taking warfarin.  
7  
8  
9

10 Patients were more likely to have good INR control in months 1-6 if they lived in a  
11 rural area, were older, or had a lower CHADS score (with lower frequencies of heart  
12 failure, stroke, and diabetes but not hypertension) – Tables 1 and 2. In fact, all  
13 comorbidities (except hypertension), including worsening degrees of kidney dysfunction,  
14 were associated with less likelihood of good INR control (Table 2, Figure 2). Despite  
15 being less likely to have TTR  $\geq$  65%, patients with CHADS scores of 2 or more had a  
16 higher frequency of INR measurements (median 11 [IQR 7-17] during months 1-6 and  
17 median 8 [IQR 6-13] in months 7-18) than patients with CHADS scores of 1 or 0  
18 (median 9 [IQR 6-14] during months 1-6 and median 7 [IQR 4-11] in months 7-18).  
19  
20  
21  
22  
23  
24  
25  
26  
27  
28  
29  
30  
31

32 Of the 16,639 patients exhibiting good INR control in the first 6 months, 8,177  
33 (57.1% of those who remained on warfarin) exhibited TTR  $\geq$  65% in months 7-12  
34 (median number of INR measurements 7, IQR 5,11) and 6,804 (56.8% of continuing  
35 warfarin users) had TTR  $\geq$  65% in months 13-18 – Table 3. Details on the frequency of  
36 INR measurements, the proportion of out-of-range INRs, and the median TTRs in each  
37 time frame are provided in Table 4. We further stratify INR control by TTR 65-80% vs.  
38 >80% in Figure 3 – this demonstrates that the proportion of patients with excellent  
39 control (TTR>80%) actually increased over time ( $p<0.001$  for trend). Good control in the  
40 first 6 months explained a significant amount of the variation in subsequent  
41 achievement of good control (Pseudo  $R^2$  0.084, Likelihood Ratio Test  $p<0.001$  for  
42 months 7-12 and Pseudo  $R^2$  0.064, Likelihood Ratio Test  $p<0.001$  for months 13-18)  
43  
44  
45  
46  
47  
48  
49  
50  
51  
52  
53  
54  
55  
56  
57  
58  
59  
60



1  
2  
3 and exhibited reasonable discrimination for good control over the subsequent year (c  
4 index 0.685 [95% CI 0.679-0.691] for months 7-12 and c index 0.665 [95% CI 0.659-  
5 0.671] for months 13-18). Of the 14,330 patients exhibiting good INR control in 1-6  
6 months and who continued on warfarin past 6 months, 6,355 (44.3%) had at least one  
7 extreme INR value (<1.5 or >4.0) in the subsequent year. After exclusion of values  
8 drawn within one week of a hospitalization, this proportion was 41.1%.  
9

10  
11 Of the 41,030 patients who either had insufficient INR monitoring or exhibited  
12 suboptimal INR control during the first 6 months, 7,856 (25.9% of those who remained  
13 on warfarin) met the definition of good INR control for months 7-12 and 7,292 (29.8% of  
14 those who remained on warfarin during that timeframe) for months 13-18 – Table 3.  
15

## 16 17 18 19 20 21 22 23 24 25 26 27 **DISCUSSION**

28  
29 We found that 30% of NVAF patients dispensed warfarin had less than 3 INRs  
30 measured in months 1-6 (with approximately one third of these patients having  
31 apparently stopped warfarin at some point in that first 6 months), and 41% of those that  
32 had regular INR measurements exhibited TTR of 65% or better. Just over half of those  
33 patients with good control in their first 6 months of warfarin therapy continued to exhibit  
34 good control over the subsequent 6 and 12 months. It is concerning that patients with  
35 higher CHADS scores or comorbidities were less likely to have INRs measured in the  
36 first 6 months and less likely to be in target range, suggesting a risk-treatment paradox  
37 in atrial fibrillation management in that higher risk patients appear to receive less  
38 optimal care.[15] A similar pattern was seen in the ORBIT-AF registry.[16] This may  
39 not necessarily reflect physician intent and may result from the fact that comorbidities  
40 such as heart failure, cirrhosis, cancer, alcohol misuse, kidney dysfunction, and  
41  
42  
43  
44  
45  
46  
47  
48  
49  
50  
51  
52  
53  
54  
55  
56  
57  
58  
59  
60

1  
2  
3 dementia can negatively impact TTR either through poorer medication adherence or  
4 biological variation in clotting factors (as are other factors such as malnutrition,  
5  
6 fluctuating liver function, etc which are not captured by administrative databases).  
7  
8  
9

10 Although there is a published prediction score for identifying patients who are  
11 more likely to have poor INR control[17], this includes factors (such as ethnicity or  
12 tobacco use) which cannot be derived from administrative data and thus it has limited  
13 utility for comparative effectiveness research. Practitioner and health care system  
14 factors are also predictors of suboptimal TTR ratios in the literature.[9,10]  
15  
16  
17  
18  
19  
20  
21

22 Our TTR and INR stability results are similar to those reported from ORBIT-AF in  
23 the US,[8] but much lower than the levels of control reported in the Veterans Health  
24 Administration[10] and a recent Swedish nationwide study.[18] Although we suspect  
25 that the higher degree of INR control and better maintenance of that control over time in  
26 the Swedish and VA studies reflects better integration and continuity of primary care in  
27 those settings, this cannot be definitively answered in observational studies such as  
28 these. However, results from a recent audit of 474 primary care physicians in Canada  
29 would support this contention as the median TTR for warfarin-treated AF patients who  
30 had regular primary care physician follow-up was 75%.[19]  
31  
32  
33  
34  
35  
36  
37  
38  
39  
40  
41  
42

43 As we were able to link inpatient and outpatient administrative data, prescribing  
44 data, and outpatient laboratory data to examine INR control for NVAF patients in an  
45 entire Canadian province whether they were treated by primary care physicians or  
46 specialists, our results are generalizable to the broader population of patients with  
47 NVAF treated in a single-payer universal access healthcare system such as Alberta.  
48  
49  
50  
51  
52  
53  
54  
55  
56  
57  
58  
59  
60

1  
2  
3 are prone to. However, there are some limitations to our analysis. First, as we focused  
4  
5 on patients newly initiated on warfarin, some may argue that this would artificially inflate  
6  
7 their INR variability; however, we excluded inpatient and outpatient INRs drawn within  
8  
9 the first 30 days of warfarin dispensation to limit this impact. Second, it could be argued  
10  
11 that excluding patients who were prescribed warfarin for less than 30 days may have  
12  
13 introduced a selection bias but our interest was on patients chronically using warfarin.  
14  
15 We have no information on why some patients stopped warfarin after less than 30 days  
16  
17 of therapy (in later years some may have in fact been switched to a novel direct oral  
18  
19 anticoagulant which in the years studied was not covered publically in Alberta except  
20  
21 with special authorization). Third, we relied on pharmacy dispensation records to  
22  
23 determine which patients were taking warfarin and acknowledge that warfarin may be  
24  
25 ingested differently than prescribed or patients may be non-adherent even if filling  
26  
27 prescriptions. Fourth, we assumed the target INR ranges were 2-3 for all patients, but  
28  
29 recognize that for a small proportion of NVAF patients a higher (or lower) range may be  
30  
31 targeted clinically if patients have had thromboembolic (or bleeding) events when INR  
32  
33 was between 2 and 3. Fifth, we focused solely on INR control and didn't examine  
34  
35 clinical endpoints and any association with out of range values, although other studies  
36  
37 have demonstrated a clear relation between out of range INRs and bleeding or  
38  
39 thromboembolic events.[4-6,18] It is important to acknowledge that some patients may  
40  
41 still have events even if well anticoagulated, which may merely reflect the expected rate  
42  
43 of non-cardioembolic strokes in patients of the same age, sex, and comorbidity profile  
44  
45 without NVAF rather than failure of anticoagulant treatment.[20]  
46  
47  
48  
49  
50  
51  
52  
53  
54  
55  
56  
57  
58  
59  
60

1  
2  
3 While many of the early quality improvement studies in NVAF focused on  
4 warfarin dosing algorithms,[21,22] more recent studies[23] have highlighted the  
5 contribution of gaps in laboratory monitoring to suboptimal warfarin management –  
6 indeed we also found that a large subset of patients did not have sufficient INR values  
7 measured to calculate TTR. Our findings support the emphasis in current quality  
8 improvement efforts[24] to not only increase the use of dosing algorithms but to also  
9 encourage regular monitoring of INRs. Our findings also support those who argue for  
10 choosing a direct oral anticoagulant as the first agent for patients with NVAF given that  
11 future adherence with monitoring cannot accurately be predicted. However, our findings  
12 challenge the assumption that patients who have been well controlled on warfarin in  
13 clinical practice will invariably exhibit deteriorating control over time - one of the key  
14 arguments advanced in favour of switching from warfarin to the direct oral  
15 anticoagulants in chronically treated patients. We would agree with the authors of a  
16 recent nationwide audit from Sweden that “well-managed warfarin therapy...is still a  
17 valid alternative for prophylaxis of AF-associated stroke.”[18]  
18  
19  
20  
21  
22  
23  
24  
25  
26  
27  
28  
29  
30  
31  
32  
33  
34  
35  
36  
37  
38  
39  
40  
41  
42  
43  
44  
45  
46  
47  
48  
49  
50  
51  
52  
53  
54  
55  
56  
57  
58  
59  
60

**ACKNOWLEDGEMENTS:**

The authors of this report are grateful to Sophanny Tiv for database development. This study is based in part by data provided by Alberta Health and Alberta Health Services.

The interpretation and conclusions are those of the researchers and do not represent the views of the Government of Alberta or Alberta Health Services. Neither the Government of Alberta nor, Alberta Health or Alberta Health Services express any opinion in relation to this study.

**FUNDING AND COMPETING INTEREST STATEMENT:**

All authors have completed the *Unified Competing Interest form* (available on request from the corresponding author) and declare: no relevant conflicts of interest; no financial relationships with any organisations that might have an interest in the submitted work in the previous three years, and no other relationships or activities that could appear to have influenced the submitted work. This work was supported by a peer-reviewed operating grant from the Heart and Stroke Foundation of Canada, GIA-15-0008887. FM is supported by a career salary award from Alberta Innovates-Health Solutions and holds the University of Alberta Chair in Cardiovascular Outcomes Research. The funders had no role in the design or analysis of this study, nor in the drafting or approval of this manuscript.

**CONTRIBUTORS:** FM conceived the study concept and design; NW and BH were involved in acquisition of the data; NW did the analyses; FM wrote the first draft of the manuscript; all authors reviewed and revised the manuscript for intellectual content. FM

1  
2  
3 and NW have access to all the data in the study and take responsibility for the integrity  
4  
5 of the data and the accuracy of the data analysis.  
6  
7

8 **GUARANTOR:** Dr. McAlister is the guarantor for this manuscript and has the right  
9  
10 to grant on behalf of all authors and does grant on behalf of all authors, an exclusive  
11  
12 licence (or non exclusive for government employees) on a worldwide basis to the BMJ  
13  
14 Publishing Group Ltd to permit this article (if accepted) to be published in BMJ editions  
15  
16 and any other BMJ PGL products and sublicences such use and exploit all subsidiary  
17  
18 rights, as set out in our licence  
19  
20  
21

22 **TRANSPARENCY DECLARATION:** Dr. McAlister affirms that the manuscript is an  
23  
24 honest, accurate, and transparent account of the study being reported; that no important  
25  
26 aspects of the study have been omitted; and that any discrepancies from the study as  
27  
28 planned (and, if relevant, registered) have been explained.  
29  
30  
31

32 **DATA SHARING:** no additional data available.  
33  
34  
35  
36  
37  
38  
39  
40  
41  
42  
43  
44  
45  
46  
47  
48  
49  
50  
51  
52  
53  
54  
55  
56  
57  
58  
59  
60

## REFERENCES

1. Wan Y, Heneghan C, Perera R, Roberts N, Hollowell J, Glasziou P, et al. Anticoagulation control and prediction of adverse events in patients with atrial fibrillation. A systematic review. *Circ Cardiovasc Qual Outcomes* 2008;1:84-91.
2. Evans A, Kalra L. Are the results of randomized controlled trials on anticoagulation in patients with atrial fibrillation generalizable to clinical practice? *Arch Intern Med* 2001;161:1443-1447.
3. Go AS, Hylek EM, Chang Y, Phillips KA, Henault LE, Capra AM, et al. Anticoagulation therapy for stroke prevention in atrial fibrillation. How well do randomized trials translate into clinical practice? *JAMA* 2003;290:2685-2692.
4. Connolly SJ, Pogue J, Eikelboom J, Flaker G, Commerford P, Franzosi MG, et al for the ACTIVE W Investigators. Benefit of oral anticoagulant over antiplatelet therapy in atrial fibrillation depends on the quality of International Normalized Ratio control achieved by centers and countries as measured by time in therapeutic range. *Circulation* 2008;118:2029-2037.
5. White HD, Gruber M, Feyzi J, Kaatz S, Tse H, Husted S, Albers GW. Comparison of outcomes among patients randomized to Warfarin therapy according to anticoagulant control. *Arch Intern Med* 2007;167-:239-245.
6. Veeger NJGM, Piersma-Wichers M, Tijssen JGP, Hillege HL, van der Meer J. Individual time within target range in patients treated with vitamin K antagonists: main determinant of quality of anticoagulation and predictor of clinical outcome. A retrospective study of 2300 consecutive patients with venous thromboembolism. *Brit J Haematology* 2005;128:513–519.

- 1  
2  
3  
4  
5  
6  
7  
8  
9  
10  
11  
12  
13  
14  
15  
16  
17  
18  
19  
20  
21  
22  
23  
24  
25  
26  
27  
28  
29  
30  
31  
32  
33  
34  
35  
36  
37  
38  
39  
40  
41  
42  
43  
44  
45  
46  
47  
48  
49  
50  
51  
52  
53  
54  
55  
56  
57  
58  
59  
60
7. Rosendaal FR, Cannegieter SC, van der Meer FJM, Briet E. A method to determine the optimal intensity of oral anticoagulant therapy. *Thromb Haemost* 1993; 29:236-239.
8. Pokorney SD, Simon DS, Thomas L, Gersh BJ, Hylek EM, Piccini JP, Peterson ED. Stability of international normalized ratios in patients taking long-term warfarin therapy. *JAMA* 2016;316:661-663.
9. Singer DE, Hellkamp AS, Piccini JP, Mahaffey KW, Lokhnygina Y, Pan G, et al. Impact of global geographic region on time in therapeutic range on warfarin anticoagulant therapy: data from the ROCKET AF clinical trial. *J Am Heart Assoc* 2013;2:e000067.
10. Rose AJ, Hylek EM, Ozonoff A, Ash AS, Reisman JI, Berlowitz DR. Risk-Adjusted percent time in therapeutic range as a quality indicator for outpatient oral anticoagulation. Results of the veterans affairs study to improve anticoagulation (VARIA). *Circ Cardiovasc Qual Outcomes* 2011;4:22-29.
11. McAlister FA, Wiebe N, Jun M, Sandhu R, James MT, McMurtry SM, et al. Are existing risk scores for non-valvular atrial fibrillation useful for prediction or risk adjustment in patients with chronic kidney disease? *Can J Cardiol* 2017;33:243-252.
12. Jensen PN, Johnson K, Floyd J, Heckbert SR, Carnahan R, Dublin S. A systematic review of validated methods for identifying atrial fibrillation using administrative data. *Pharmacoepi & Drug Safety* 2012;21(S1):141-147.



- 1  
2  
3 13. Quan H, Sundararajan V, Halfon P, Fong A, Burnand B, Luthi JC, et al. Coding  
4 algorithms for defining comorbidities in ICD-9-CM and ICD-10 administrative  
5 data. *Med Care* 2005;43:1130-1139.  
6  
7  
8  
9  
10 14. Tonelli M, Wiebe N, Fortin M, Guthrie B, Hemmelgarn BR, James MT, et al. for  
11 the Alberta Kidney Disease Network. Methods for identifying 30 chronic  
12 conditions: application to administrative data. *BMC Medical Informatics and*  
13 *Decision Making* 2015;15:31. DOI 10.1186/s12911-015-0155-5  
14  
15  
16  
17  
18  
19 15. Sandhu RK, Bakal J, Ezekowitz JA, McAlister FA. Risk stratification schemes,  
20 anticoagulation use, and outcomes: The risk treatment paradox in patients with  
21 newly diagnosed non-valvular atrial fibrillation. *Heart* 2011;97:2046-50.  
22  
23  
24  
25  
26  
27 16. Pokorney SD, Simon DN, Thomas L, Fonarow GC, Kowey PR, Change P, et al  
28 for the ORBIT-AF Investigators. Patient's time in therapeutic range on warfarin  
29 among US patients with atrial fibrillation: Results from ORBIT-AF Registry. *Am*  
30 *Heart J* 2015;170:141-148.  
31  
32  
33  
34  
35  
36 17. Apostolakis S, Sullivan RM, Olshansky B, Lip GYH. Factors affecting quality of  
37 anticoagulation control among patients with atrial fibrillation on Warfarin - the  
38 SAME-TT<sub>2</sub>R<sub>2</sub> Score. *CHEST* 2013;144:1555–1563.  
39  
40  
41  
42  
43 18. Björck F, Renlund H, Lip GYH, Wester P, Svensson PJ, Själander A. Outcomes  
44 in a warfarin-treated population with atrial fibrillation. *JAMA Cardiol* 2016;1:172-  
45 180.  
46  
47  
48  
49  
50 19. Angaran P, Dorian P, Tan MK, Kerr CR, Green MS, Gladstone DJ, et al. The risk  
51 stratification and stroke prevention therapy care gap in Canadian atrial fibrillation  
52 patients. *Can J Cardiol* 2016;32:336–343.  
53  
54  
55  
56  
57  
58  
59  
60

- 1  
2  
3  
4  
5  
6  
7  
8  
9  
10  
11  
12  
13  
14  
15  
16  
17  
18  
19  
20  
21  
22  
23  
24  
25  
26  
27  
28  
29  
30  
31  
32  
33  
34  
35  
36  
37  
38  
39  
40  
41  
42  
43  
44  
45  
46  
47  
48  
49  
50  
51  
52  
53  
54  
55  
56  
57  
58  
59  
60
20. Freedman B, Martinez C, Katholing A, Rietbrock S. Residual risk of stroke and death in anticoagulant-treated patients with atrial fibrillation. *JAMA Cardiol* 2016;1:366-368.
21. Sandhu RK, McAlister FA. Stroke prevention for patients with atrial fibrillation: improving but not perfect yet. *Heart* 2013;99:1141-42.
22. Van Spall HGC, Wallentin L, Yusuf S, Eikelboom JW, Nieuwlatt R, Yang S, et al. Variation in Warfarin Dose Adjustment Practice Is Responsible for Differences in the Quality of Anticoagulation Control Between Centers and Countries. *Circulation* 2012;126:2309-2316.
23. Rose AJ, Miller DR, Ozonoff A, Berlowitz DR, Ash AS, Zhao S, et al. Gaps in monitoring during oral anticoagulation: insights into care transitions, monitoring barriers, and medication nonadherence. *Chest* 2013;143:751-757.
24. Rose AJ, Park A, Gillespie C, Van Deusen Lukas C, Ozonoff A, Petrakis BA, et al. Results of a regional effort to improve warfarin management. *Ann Pharmacother* 2017;51:373-379.

## Figure Legends:

### Figure 1. Participant flow

AKDN Alberta Kidney Disease Network (dataset containing administrative records for all 4.6 million Albertans), NVAF non-valvular atrial fibrillation. Note that percentages in the last row of boxes reflect the proportions among patients still prescribed warfarin in that timeframe.

### Figure 2. Proportion of patients with with at least 3 INRs in months 1-6 and Time in Therapeutic Range $\geq 65\%$ in different timeframes, broken down by estimated glomerular filtration rate

INR international normalized ratio, GFR glomerular filtration rate, TTR time in therapeutic range

The height of the bars shows the percentage of participants that meet target in each 6-month interval of follow-up. The green bars represent all participants (followed and on anticoagulants) including those without estimated GFR in the first 6 months. The remaining four colors represents participants with varying levels of estimated GFR ( $\text{mL}/\text{min} \times 1.73\text{m}^2$ ) in the first 6 months.

### Figure 3. Proportion of patients with Time in Therapeutic Range in various strata over time

The height of the bars shows the percentage of all participants (followed and on anticoagulants) that fall into each 'time in TTR' interval by each 6-month interval of follow-up. The black bars show the percentage of patients that met target  $<65\%$  of the time, the medium gray bars show the percentage of patients that met target between  $65\%$  and  $80\%$  of the time, and the light gray bars show the percentage of patients that met target at least  $80\%$  of the time.

**Table 1. Baseline characteristics by time in therapeutic range in months 1-6 of warfarin use**

|                                     | Overall<br>(n=57,669) | Time in Therapeutic<br>Range <65% or<br>infrequent INRs<br>(n=41,030) | Time in<br>Therapeutic<br>Range ≥65%<br>(n=16,639) | P<br>value |
|-------------------------------------|-----------------------|-----------------------------------------------------------------------|----------------------------------------------------|------------|
| Age, yrs                            |                       |                                                                       |                                                    | <0.001     |
| 65-74                               | 13,112 (22.7)         | 9,538 (23.2)                                                          | 3,574 (21.5)                                       |            |
| 75-84                               | 15,265 (26.5)         | 10,663 (26)                                                           | 4,602 (27.7)                                       |            |
| ≥85                                 | 29,292 (50.8)         | 20,829 (50.8)                                                         | 8,463 (50.9)                                       |            |
| Female                              | 25,655 (44.5)         | 18,334 (44.7)                                                         | 7,321 (44.0)                                       | 0.13       |
| Rural residence                     | 7,670 (13.3)          | 5,325 (13.0)                                                          | 2,345 (14.1)                                       | <0.001     |
| CHADS <sub>2</sub> score            | 2 (2,4)               | 3 (2,4)                                                               | 2 (1,3)                                            | <0.001     |
| Prior myocardial infarction         | 8,304 (14.4)          | 6,108 (14.9)                                                          | 2,196 (13.2)                                       | <0.001     |
| Prior stroke/TIA                    | 15,786 (27.4)         | 11,350 (27.7)                                                         | 4,436 (26.7)                                       | 0.01       |
| Alcohol use disorder                | 2,736 (4.7)           | 2,268 (5.5)                                                           | 468 (2.8)                                          | <0.001     |
| Cancer, metastatic                  | 1,639 (2.8)           | 1,327 (3.2)                                                           | 312 (1.9)                                          | <0.001     |
| Cancer, non-metastatic <sup>1</sup> | 5,201 (9.0)           | 3,865 (9.4)                                                           | 1,336 (8.0)                                        | <0.001     |
| Chronic heart failure               | 24,216 (42.0)         | 18,096 (44.1)                                                         | 6,120 (36.8)                                       | <0.001     |
| Chronic pulmonary disease           | 18,615 (32.3)         | 13,841 (33.7)                                                         | 4,774 (28.7)                                       | <0.001     |
| Cirrhosis                           | 286 (0.5)             | 232 (0.6)                                                             | 54 (0.3)                                           | <0.001     |
| Dementia                            | 5,418 (9.4)           | 4,228 (10.3)                                                          | 1,190 (7.2)                                        | <0.001     |
| Diabetes mellitus                   | 16,951 (29.4)         | 12,396 (30.2)                                                         | 4,555 (27.4)                                       | <0.001     |
| eGFR, mL/min*1.73m <sup>2</sup>     |                       |                                                                       |                                                    | <0.001     |
| ≥60                                 | 19,031 (55.9)         | 13,390 (32.6)                                                         | 5,641 (33.9)                                       |            |
| 45-59                               | 7,830 (23.0)          | 5,548 (13.5)                                                          | 2,282 (13.7)                                       |            |
| 30-44                               | 5,035 (14.8)          | 3,740 (9.1)                                                           | 1,295 (7.8)                                        |            |
| <30                                 | 2,135 (6.3)           | 1,661 (4.0)                                                           | 474 (2.8)                                          |            |
| Epilepsy                            | 1,455 (2.5)           | 1,137 (2.8)                                                           | 318 (1.9)                                          | <0.001     |
| Hypertension                        | 47,534 (82.4)         | 33,862 (82.5)                                                         | 13,672 (82.2)                                      | 0.30       |
| Peptic ulcer disease                | 549 (1.0)             | 445 (1.1)                                                             | 104 (0.6)                                          | <0.001     |
| Peripheral vascular disease         | 3,482 (6.0)           | 2,666 (6.5)                                                           | 816 (4.9)                                          | <0.001     |

N (%) or median (IQR) as appropriate

<sup>1</sup>Specifically breast, cervical, colorectal, lung, and prostate

CHADS<sub>2</sub> Congestive Heart Failure, Hypertension, Age, Diabetes, Stroke/Transient Ischemic Attack;  
eGFR estimated glomerular filtration rate; TIA transient ischemic attack

Table 2. Adjusted odds ratios associated with time in therapeutic range

|                                         | 1-6 months<br>(n=34,023)<br>aOR (95% CI) | 7-12 months<br>(n=42,011)<br>aOR (95% CI) | 13-18 months<br>(n=42,959)<br>aOR (95% CI) |
|-----------------------------------------|------------------------------------------|-------------------------------------------|--------------------------------------------|
| TTR ≥65% <sup>1</sup> during months 1-6 | -                                        | 3.99 (3.81,4.17)                          | 3.19 (3.05,3.34)                           |
| Age, yrs                                |                                          |                                           |                                            |
| 65-74                                   | 1.00                                     | 1.00                                      | 1.00                                       |
| 75-84                                   | 1.10 (1.02,1.18)                         | 1.36 (1.27,1.47)                          | 1.41 (1.31,1.52)                           |
| ≥85                                     | 1.10 (1.03,1.18)                         | 1.49 (1.38,1.59)                          | 1.57 (1.46,1.68)                           |
| Female                                  | 0.91 (0.86,0.95)                         | 0.95 (0.91,1.00)                          | 0.94 (0.90,0.99)                           |
| Rural residence                         | 1.13 (1.05,1.21)                         | 1.09 (1.02,1.16)                          | 1.15 (1.08,1.23)                           |
| Prior myocardial infarction             | 0.95 (0.88,1.01)                         | 0.93 (0.87,0.99)                          | 0.88 (0.82,0.94)                           |
| Prior stroke/TIA                        | 1.03 (0.97,1.08)                         | 1.03 (0.98,1.08)                          | 1.02 (0.98,1.08)                           |
| Alcohol misuse                          | 0.59 (0.51,0.67)                         | 0.67 (0.59,0.76)                          | 0.69 (0.61,0.78)                           |
| Cancer, metastatic                      | 0.61 (0.53,0.72)                         | 0.59 (0.50,0.69)                          | 0.60 (0.51,0.71)                           |
| Cancer, non-metastatic <sup>2</sup>     | 0.89 (0.81,0.97)                         | 0.90 (0.82,0.97)                          | 0.88 (0.81,0.95)                           |
| Chronic heart failure                   | 0.81 (0.77,0.85)                         | 0.95 (0.90,0.99)                          | 0.96 (0.92,1.01)                           |
| Chronic pulmonary disease               | 0.85 (0.81,0.90)                         | 0.91 (0.86,0.95)                          | 0.96 (0.91,1.01)                           |
| Cirrhosis                               | 0.86 (0.62,1.21)                         | 0.86 (0.61,1.21)                          | 0.60 (0.41,0.87)                           |
| Dementia                                | 0.72 (0.65,0.78)                         | 0.83 (0.77,0.90)                          | 0.75 (0.69,0.81)                           |
| Diabetes mellitus                       | 0.93 (0.89,0.98)                         | 0.95 (0.91,1.00)                          | 0.94 (0.90,0.99)                           |
| eGFR, mL/min*1.73m <sup>2</sup>         |                                          |                                           |                                            |
| ≥60                                     | 1.00                                     | 1.00                                      | 1.00                                       |
| 45-59                                   | 1.00 (0.94,1.06)                         | 1.01 (0.95,1.06)                          | 0.99 (0.94,1.05)                           |
| 30-44                                   | 0.89 (0.82,0.95)                         | 0.97 (0.90,1.04)                          | 0.92 (0.86,0.99)                           |
| <30                                     | 0.77 (0.69,0.86)                         | 0.78 (0.70,0.88)                          | 0.85 (0.76,0.95)                           |
| Epilepsy                                | 0.68 (0.57,0.80)                         | 0.95 (0.82,1.10)                          | 0.88 (0.76,1.01)                           |
| Hypertension                            | 1.06 (0.99,1.14)                         | 1.15 (1.07,1.23)                          | 1.15 (1.07,1.23)                           |
| Peptic ulcer disease                    | 0.69 (0.53,0.90)                         | 0.64 (0.49,0.84)                          | 0.82 (0.64,1.04)                           |
| Peripheral vascular disease             | 0.82 (0.74,0.91)                         | 0.88 (0.80,0.96)                          | 0.86 (0.79,0.95)                           |

<sup>1</sup>with at least 3 INRs in months 1-6

<sup>2</sup>specifically breast, cervical, colorectal, lung, and prostate

CI confidence interval, eGFR estimated glomerular filtration rate, TIA transient ischemic attack, TTR time in therapeutic range

Table 3. INR control (N=57,669)

|                                     | <3 INRs in<br>months 1-6<br>(n=17,099) | TTR <65% in<br>months 1-6<br>(n=23,931) | TTR ≥65% in<br>months 1-6<br>(n=16,639) |
|-------------------------------------|----------------------------------------|-----------------------------------------|-----------------------------------------|
| 7-12 months:<br>-still on warfarin  | 11,653 (68.2)                          | 18,641 (77.9)                           | 14,330 (86.1)                           |
| -TTR ≥65%                           | 1,157 (9.9)                            | 6,699 (35.9)                            | 8,177 (57.1)                            |
| 13-18 months:<br>-still on warfarin | 9,893 (57.9)                           | 14,558 (60.8)                           | 11,987 (72.0)                           |
| -TTR ≥65%                           | 1,413 (14.3)                           | 5,879 (40.4)                            | 6,804 (56.8)                            |

For peer review only

**Table 4. INR control in those with at least 3 INRs and TTR  $\geq$ 65% in months 1-6 (N=16,639)**

|                          | Months 1-6        | Months 7-12      | Months 13-18     |
|--------------------------|-------------------|------------------|------------------|
| INR counts               | 9 (3,80)          | 7 (0,70)         | 7 (0,84)         |
| >3.0, %                  | 0.0 (0.0,35.0)    | 5.9 (0.0,100.0)  | 0.0 (0.0,100.0)  |
| <2.0, %                  | 12.5 (0.0,35.0)   | 13.0 (0.0,100.0) | 12.5 (0.0,100.0) |
| INR SD                   | 0.41 (0.00,3.26)  | 0.46 (0.00,5.70) | 0.45 (0.00,5.66) |
| Median TTR, %<br>(Range) | 77.8 (65.0,100.0) | 66.7 (0,100.0)   | 62.5 (0.0,100.0) |

For peer review only

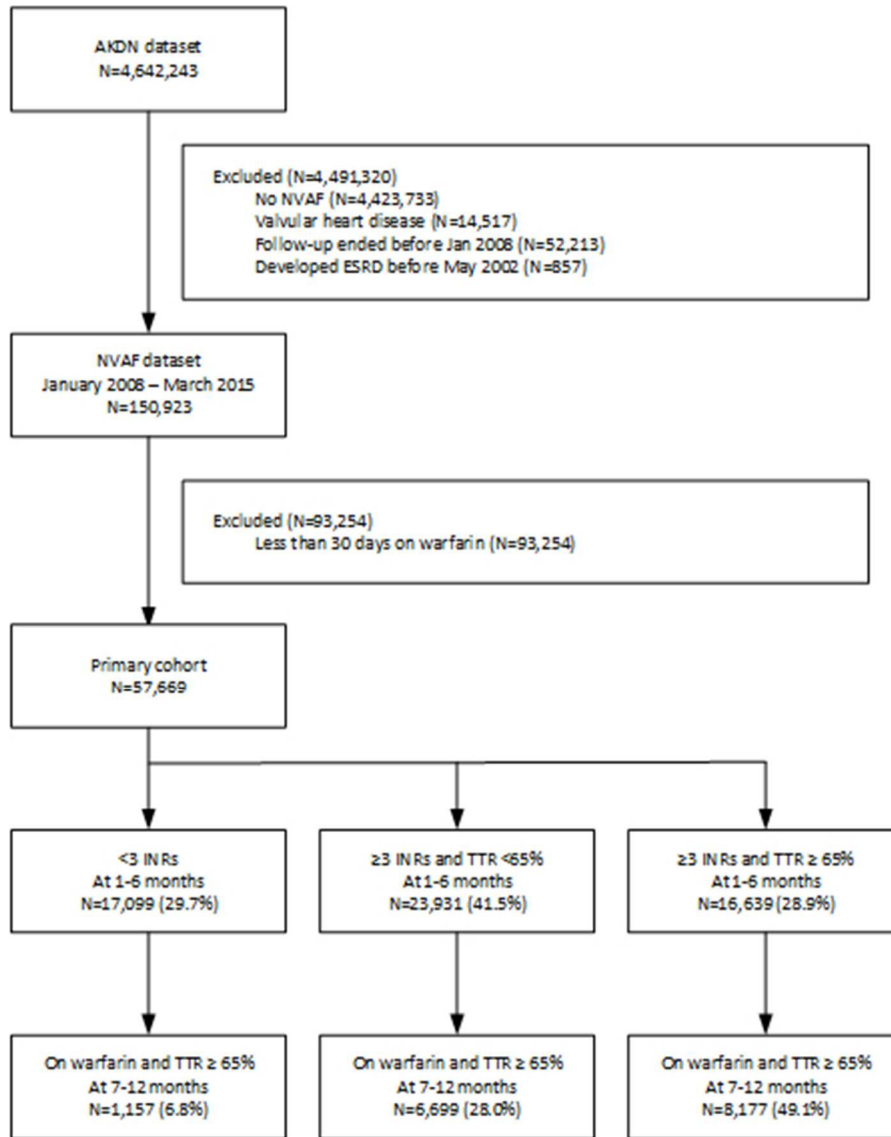

Figure 1

37x48mm (300 x 300 DPI)



1  
2  
3  
4  
5  
6  
7  
8  
9  
10  
11  
12  
13  
14  
15  
16  
17  
18  
19  
20  
21  
22  
23  
24  
25  
26  
27  
28  
29  
30  
31  
32  
33  
34  
35  
36  
37  
38  
39  
40  
41  
42  
43  
44  
45  
46  
47  
48  
49  
50  
51  
52  
53  
54  
55  
56  
57  
58  
59  
60

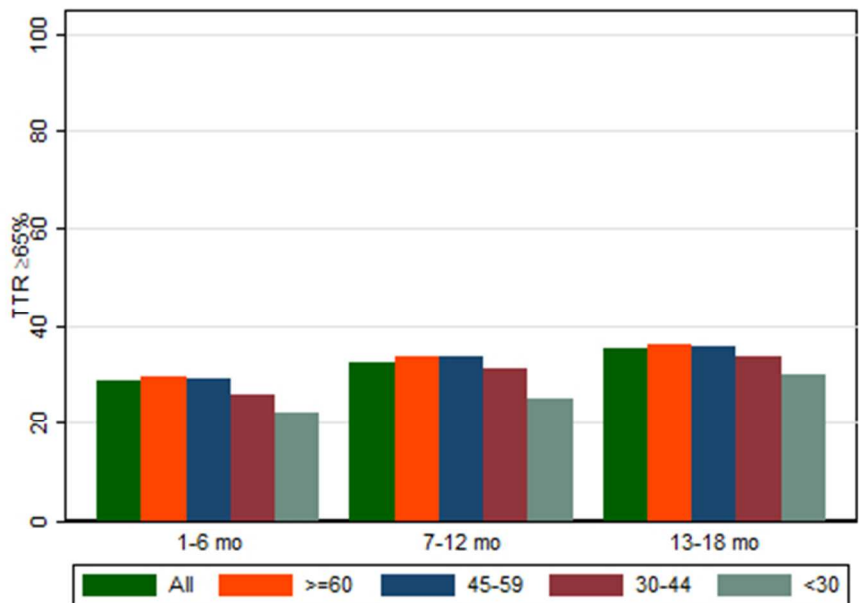

Figure 2

37x27mm (300 x 300 DPI)

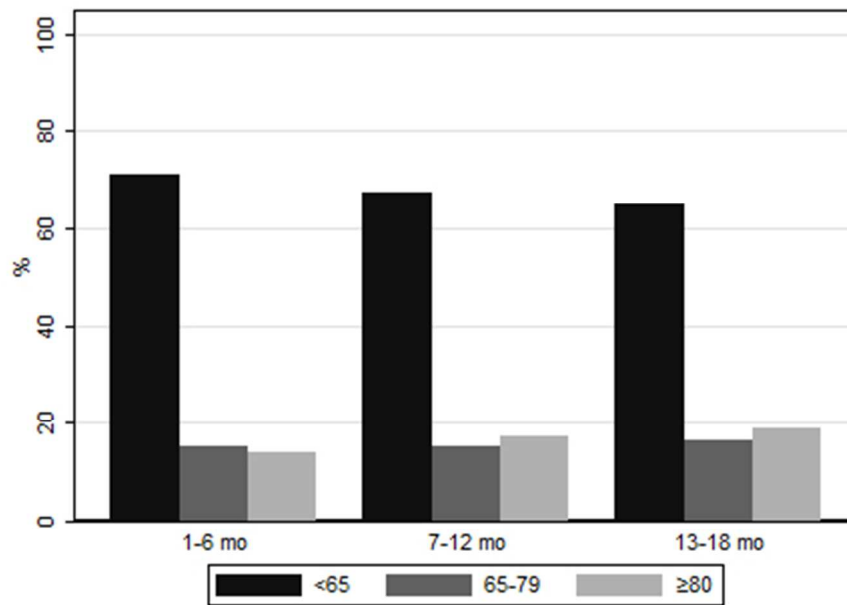

Figure 3

37x27mm (300 x 300 DPI)

**eAppendix: ICD9 and ICD10 diagnosis codes. The character “x” in code listings represents any character.**

|                                                                | ICD-9-CM                                                                                   | ICD-10-CM                                                                                                                                                                                                                                                                                                                                                                                                                                              |
|----------------------------------------------------------------|--------------------------------------------------------------------------------------------|--------------------------------------------------------------------------------------------------------------------------------------------------------------------------------------------------------------------------------------------------------------------------------------------------------------------------------------------------------------------------------------------------------------------------------------------------------|
| <b>Diagnosis</b>                                               |                                                                                            |                                                                                                                                                                                                                                                                                                                                                                                                                                                        |
| Atrial fibrillation and flutter                                | 427.3x (note: the entire tree of codes)                                                    | I48.x (note: the entire tree of codes)                                                                                                                                                                                                                                                                                                                                                                                                                 |
| Mitral or aortic valvular disease                              | 394, 396                                                                                   | I05, I08.0, I08.1, I08.2, I08.3                                                                                                                                                                                                                                                                                                                                                                                                                        |
| valve surgery & procedures                                     | Procedure codes 35.0x, 35.1x, 35.2x, 35.96, 35.97, 35.99                                   | Procedure codes 02RJ, 02RF, 02RG, 02RH, 02QF, 02QG, 02QH, 02QJ<br><br>CCI Procedure Codes: 1.HT.89, 1.HV.80, 1.HU.80, 1.HT.80, 1.HS.80, 1.HV.90, 1.HU.90, 1.HT.90, 1.HS.90                                                                                                                                                                                                                                                                             |
| <b>Co-morbidities</b>                                          |                                                                                            |                                                                                                                                                                                                                                                                                                                                                                                                                                                        |
| Ischemic Heart Disease                                         | 410, 411, 412, 413, 414, 429.2, V45.81, procedure codes 36.xx                              | I20-I25, procedure codes 0210, 0211, 0212, 0213<br><br>CCI Procedure codes: 1.IJ.76, 1.IJ.50, 1.IJ.57                                                                                                                                                                                                                                                                                                                                                  |
| MI                                                             | 410, 412                                                                                   | I21, I22, I25.2                                                                                                                                                                                                                                                                                                                                                                                                                                        |
| Angina                                                         | 411.1, 413                                                                                 | I20                                                                                                                                                                                                                                                                                                                                                                                                                                                    |
| Peripheral vascular diseases (PAD, aneurysm, dissection, etc.) | 440, 441, 442, 443, 447.1, 557.1, 557.9, procedure codes 39.22, 39.25, 39.26, 39.29, 39.50 | I70, I71, I72, I73, I77.1, I79.0, K55.1, K55.8, K55.9, Z95.82x, Z95.9, procedure codes 031, 03Q, 041, 04Q<br><br>CCI Procedure Codes: 1.KE.76, 1.KA.76, 1.ID.76, 1.IB.76, 1.IA.76, 1.ID.76, 1.IC.76, 1.JM.76, 1.JJ.76, 1.KT.76, 1.KR.76, 1.KE.76, 1.KG.76, 1.JM.76, 1.JK.76, 1.JX.76, 1.JY.76, 1.KA.50, 1.IB.50, 1.IA.50, 1.ID.50, 1.IC.50, 1.KE.50, 1.JJ.50, 1.JL.50, 1.KG.50, 1.KA.57, 1.IB.57, 1.ID.57, 1.IC.57, 1.KE.57, 1.KT.57, 1.KG.57, 1.JM.57 |
| PAD                                                            | 440, 443.9                                                                                 | I70, I73.9                                                                                                                                                                                                                                                                                                                                                                                                                                             |
| Cerebrovascular disease                                        | 430-438, 362.3, procedure codes 38.12, 39.74                                               | I60-64, I65-69, G45, G46, H34.x (x = 0, 1, 8, 9), procedure codes 031y, where y is any of [G, S, T, H, J, K, M, L, N], and                                                                                                                                                                                                                                                                                                                             |

|                               |                                         |                                                                                                                                                                                   |
|-------------------------------|-----------------------------------------|-----------------------------------------------------------------------------------------------------------------------------------------------------------------------------------|
|                               |                                         | 03Qy, where y is any of [G, H, J, K, L, M, N, P, Q, R, S, T]<br><br>CCI Procedure Codes: 1.ID.76, 1.JE.76, 1.JX.76, 1.JE.50, 1.JX.50, 1.JE.57, 1.JX.57, 1.JW.57, 1.JW.76, 1.JW.50 |
| Ischemic Stroke               | 434                                     | I63                                                                                                                                                                               |
| TIA                           | 435                                     | G45                                                                                                                                                                               |
| Intracranial Hemorrhage       | 430, 431, 432.x (x = 0, 1, 9)           | I60, I61.x, I62.x (x = 0, 1, 9)                                                                                                                                                   |
| Systemic Embolism             | 444                                     | I74                                                                                                                                                                               |
| Heart Failure                 | 428                                     | I50                                                                                                                                                                               |
| Hypertension                  | 401-405                                 | I10-I15                                                                                                                                                                           |
| Diabetes                      | 250                                     | E10-E13                                                                                                                                                                           |
| Chronic pulmonary disease     | 490 - 496, 500-505, 506.4, 508.1, 508.8 | I27.8, I27.9, J40-J47, J60-J67, J68.4, J70.1, J70.3                                                                                                                               |
| Cancer                        | 140-209, 230-234                        | C00 -C26, C30-41, C43-C58, C60 - C80, C81-96, D00-09                                                                                                                              |
| Dementia                      | 290, 294.1, 294.2, 331.xx               | F01, F02, F03, G30, G31                                                                                                                                                           |
| Peptic ulcer disease          | 530.2, 531, 532, 533, 534               | K22.1, K25, K26, K27, K28                                                                                                                                                         |
| Chronic Kidney Disease        | 583, 584, 585, 586, 592, 593.9          | N00-N23                                                                                                                                                                           |
| Abnormal liver function tests | 570-573, 574.x1                         | K70-K77                                                                                                                                                                           |

STROBE 2007 (v4) Statement— for McAlister et al. TIME IN THERAPEUTIC RANGE AND STABILITY OVER TIME FOR WARFARIN USERS IN CLINICAL PRACTICE: AN  
 OBSERVATIONAL STUDY USING LINKED ROUTINELY COLLECTED HEALTH DATA

| Section/Topic             | Item # | Recommendation                                                                                                                                                                       | Reported on page # |
|---------------------------|--------|--------------------------------------------------------------------------------------------------------------------------------------------------------------------------------------|--------------------|
| Title and abstract        | 1      | (a) Indicate the study’s design with a commonly used term in the title or the abstract                                                                                               | 1                  |
|                           |        | (b) Provide in the abstract an informative and balanced summary of what was done and what was found                                                                                  | 2                  |
| <b>Introduction</b>       |        |                                                                                                                                                                                      |                    |
| Background/rationale      | 2      | Explain the scientific background and rationale for the investigation being reported                                                                                                 | 5-6                |
| Objectives                | 3      | State specific objectives, including any prespecified hypotheses                                                                                                                     | 6                  |
| <b>Methods</b>            |        |                                                                                                                                                                                      |                    |
| Study design              | 4      | Present key elements of study design early in the paper                                                                                                                              | 2, 6               |
| Setting                   | 5      | Describe the setting, locations, and relevant dates, including periods of recruitment, exposure, follow-up, and data collection                                                      | 2, 6-8             |
| Participants              | 6      | (a) Give the eligibility criteria, and the sources and methods of selection of participants. Describe methods of follow-up                                                           | 2, 7               |
|                           |        | (b) For matched studies, give matching criteria and number of exposed and unexposed                                                                                                  | n/a                |
| Variables                 | 7      | Clearly define all outcomes, exposures, predictors, potential confounders, and effect modifiers. Give diagnostic criteria, if applicable                                             | 7-8                |
| Data sources/ measurement | 8*     | For each variable of interest, give sources of data and details of methods of assessment (measurement). Describe comparability of assessment methods if there is more than one group | 7-8                |
| Bias                      | 9      | Describe any efforts to address potential sources of bias                                                                                                                            | 6                  |
| Study size                | 10     | Explain how the study size was arrived at                                                                                                                                            | n/a                |
| Quantitative variables    | 11     | Explain how quantitative variables were handled in the analyses. If applicable, describe which groupings were chosen and why                                                         | 8-9                |
| Statistical methods       | 12     | (a) Describe all statistical methods, including those used to control for confounding                                                                                                | 8-9                |
|                           |        | (b) Describe any methods used to examine subgroups and interactions                                                                                                                  | 8-9                |
|                           |        | (c) Explain how missing data were addressed                                                                                                                                          | 8-9                |

|                          |     |                                                                                                                                                                                                              |                                |
|--------------------------|-----|--------------------------------------------------------------------------------------------------------------------------------------------------------------------------------------------------------------|--------------------------------|
|                          |     | (d) If applicable, explain how loss to follow-up was addressed                                                                                                                                               | 8                              |
|                          |     | (e) Describe any sensitivity analyses                                                                                                                                                                        | 8-9                            |
| <b>Results</b>           |     |                                                                                                                                                                                                              |                                |
| Participants             | 13* | (a) Report numbers of individuals at each stage of study—eg numbers potentially eligible, examined for eligibility, confirmed eligible, included in the study, completing follow-up, and analysed            | 9 and figure 1                 |
|                          |     | (b) Give reasons for non-participation at each stage                                                                                                                                                         | Figure 1                       |
|                          |     | (c) Consider use of a flow diagram                                                                                                                                                                           | Figure 1                       |
| Descriptive data         | 14* | (a) Give characteristics of study participants (eg demographic, clinical, social) and information on exposures and potential confounders                                                                     | Table 1                        |
|                          |     | (b) Indicate number of participants with missing data for each variable of interest                                                                                                                          | Table 1                        |
|                          |     | (c) Summarise follow-up time (eg, average and total amount)                                                                                                                                                  | 9                              |
| Outcome data             | 15* | Report numbers of outcome events or summary measures over time                                                                                                                                               | 9-11, Tables 2 and 3, Figure 2 |
| Main results             | 16  | (a) Give unadjusted estimates and, if applicable, confounder-adjusted estimates and their precision (eg, 95% confidence interval). Make clear which confounders were adjusted for and why they were included | 9-11, Tables 2 and 3, Figure 2 |
|                          |     | (b) Report category boundaries when continuous variables were categorized                                                                                                                                    | 9-11, Tables 2 and 3, Figure 2 |
|                          |     | (c) If relevant, consider translating estimates of relative risk into absolute risk for a meaningful time period                                                                                             | n/a                            |
| Other analyses           | 17  | Report other analyses done—eg analyses of subgroups and interactions, and sensitivity analyses                                                                                                               | 9-11, Tables 2 and 3, Figure 2 |
| <b>Discussion</b>        |     |                                                                                                                                                                                                              |                                |
| Key results              | 18  | Summarise key results with reference to study objectives                                                                                                                                                     | 11                             |
| <b>Limitations</b>       |     |                                                                                                                                                                                                              |                                |
| Interpretation           | 20  | Give a cautious overall interpretation of results considering objectives, limitations, multiplicity of analyses, results from similar studies, and other relevant evidence                                   | 11-12, 13-14                   |
| Generalisability         | 21  | Discuss the generalisability (external validity) of the study results                                                                                                                                        | 11-12, 13-14                   |
| <b>Other information</b> |     |                                                                                                                                                                                                              |                                |
| Funding                  | 22  | Give the source of funding and the role of the funders for the present study and, if applicable, for the original study on which the present article is based                                                | 15                             |
